# Supplementary material
Source: HighWire-hosted journal article supplement (https://mentalhealth.bmj.com/content/21/3/87)

## **SUPPLEMENTAL MATERIAL 1. Search strategy/syntax**

**Last search performed on 05.05.18**

### **PUBMED (MEDLINE)**

- Search terms:

(meditation OR mindful OR mindfulness OR mindfulness-based OR vipassana OR zen OR yoga OR yogic OR pranayama OR sudarshan OR qi-gong OR qigong OR chi kung OR kundalini OR chundosunbup OR reiki OR tai chi OR mantra OR kirtane OR samantha OR kriya OR "loving kindness" OR "self compassion" OR "self-compassion" OR dharan OR vajrayana OR samadi OR zaizen OR patanjali OR MSC OR MBCT OR MBSR OR dhyani OR "acceptance and commitment therapy" OR acceptance commitment therapy) AND (ADHD OR attention deficit OR attention-deficit OR hyperkinetic syndrome OR hyperkinetic disorder) AND (randomly OR randomized OR randomised)

Limits: **none**

### **OVID databases**

**PsycInfo, EMBASE+EMBASE classic, OVID Medline**

Search terms:

(meditation OR mindful OR mindfulness OR mindfulness-based OR vipassana OR zen OR yoga OR yogic OR pranayama OR sudarshan OR qi-gong OR qigong OR chi kung OR kundalini OR chundosunbup OR reiki OR tai chi OR mantra OR kirtane OR samantha OR kriya OR "loving kindness" OR "self compassion" OR "self-compassion" OR dharan OR vajrayana OR samadi OR zaizen OR patanjali OR MSC OR MBCT OR MBSR OR dhyani OR "acceptance and commitment therapy" OR acceptance commitment therapy) AND (ADHD OR attention deficit OR attention-deficit OR hyperkinetic syndrome OR hyperkinetic disorder) AND (randomly OR randomized OR randomised)

Limits: **none**

**WEB OF KNOWLEDGE**

**(Web of science (science citation index expanded), Biological abstracts, Biosis, Food science and technology abstracts)**

Search terms:

meditation OR mindful OR mindfulness OR mindfulness-based OR vipassana OR zen OR yoga OR yogic OR pranayama OR sudarshan OR qi-gong OR qigong OR chi kung OR kundalini OR chundosunbup OR reiki OR tai chi OR mantra OR kirtane OR samantha OR kriya OR "loving kindness" OR "self compassion" OR "self-compassion" OR dharan OR vajrayana OR samadi OR zaizen OR patanjali OR MSC OR MBCT OR MBSR OR dhyani OR "acceptance and commitment therapy" OR acceptance commitment therapy

ADHD OR attention deficit OR attention-deficit OR hyperkinetic syndrome OR hyperkinetic disorder

randomly OR randomized OR randomised

Limits: **none**

**SUPPLEMENTAL MATERIAL 2. References excluded after reading the full text, with reason.**

| Author(year)                                                                                                                                                                                                                                                                                                                                        | reasons                                                  |
|-----------------------------------------------------------------------------------------------------------------------------------------------------------------------------------------------------------------------------------------------------------------------------------------------------------------------------------------------------|----------------------------------------------------------|
| Behbahani M, Zargar F. Effectiveness of mindful parenting training on clinical symptoms and self-efficacy in children with attention deficit hyperactivity disorder. [Persian]. <i>Journal of Isfahan Medical School</i> 2017;35(429):511-17.                                                                                                       | Authors contacted but not able to provide requested data |
| Beik M, Nezakatalhoseini M, Abedi A, et al. The effect of yoga training on cognitive-motor functions in children with attention deficit-Hyperactivity disorder. <i>Advances in Cognitive Science</i> 2015;17(2[66]; 66):56-67.                                                                                                                      | Authors contacted but not able to provide requested data |
| Cohen SCL, Harvey DJ, Shields RH, et al. Effects of Yoga on Attention, Impulsivity, and Hyperactivity in Preschool-Aged Children with Attention-Deficit Hyperactivity Disorder Symptoms. <i>Journal of developmental and behavioral pediatrics : JDBP</i> 2018;39(3):200-09. doi: 10.1097/dbp.0000000000000552 [published Online First: 2018/03/15] | Authors contacted but not able to provide requested data |
| Dehkordian P, Hamid N, Beshlideh K, et al. The Effectiveness of Mindful Parenting, Social Thinking and Exercise on Quality of Life in ADHD Children. <i>International Journal of Pediatrics-Mashhad</i> 2017;5(2):4295-302. doi: 10.22038/ijp.2016.7900                                                                                             | Outcome measures of interest not provided                |
| Ghorbani M, Khalilian R. Effects of mindfulness training on working memory and behavioral inhibition for adults with attention deficit / hyperactivity. <i>Advances in Cognitive Science</i> 2016;18(3[71]; 71):90-100.                                                                                                                             | Authors contacted but not able to provide requested data |
| Janssen, L., Kan, C. C., Carpentier, P. J., Sizoo, B., Hepark, S., Grutters, J., . . . Speckens, A. E. (2015). Mindfulness based cognitive therapy versus treatment as usual in adults with attention deficit hyperactivity disorder (ADHD). <i>BMC Psychiatry</i> , 15, 216. doi:10.1186/s12888-015-0591-x                                         | Just a protocol                                          |
| Jernelov S, Larsson Y, Llenas M, et al. Better sleep in psychiatric care; a pilot study of a behavioral treatment for insomnia in ADHD. <i>Sleep Medicine</i> 2017;40 (Supplement 1):e150.                                                                                                                                                          | Not RCT                                                  |
| Lee B, 계홍경, 오산산, et al. Effects of Tai Chi on Attention and Dynamic Balance in Children and Adolescent with ADHD. <i>Journal of adapted physical activity and exercise</i> 2015;23(3):1-11.                                                                                                                                                         | Authors contacted but not able to provide requested data |
| Meppelink R, de Bruin EI, Bogels SM. Meditation or Medication? Mindfulness training versus medication in the treatment of childhood ADHD: a randomized controlled trial. <i>BMC psychiatry</i> 2016;16:267. doi: 10.1186/s12888-016-0978-3 [published Online First: 2016/07/28]                                                                     | Authors contacted but not able to provide requested data |
| Rice, V. J., Liu, B., Schroeder, P. J. (2018). Impact of in-person and virtual world mindfulness training on symptoms of post-traumatic stress disorder and attention deficit and hyperactivity disorder. <i>Military Medicine</i> , 183(Supplement 1), 413-20. doi: 10.1093/milmed/usx227                                                          | No RCT                                                   |

### SUPPLEMENTAL MATERIAL 3. List of studies included in the meta-analysis.

#### Fleming (2015)

- Fleming AP, McMahon RJ, Moran LR, et al. Pilot randomized controlled trial of dialectical behavior therapy group skills training for ADHD among college students. *Journal of attention disorders* 2015;19(3):260-71. doi: 10.1177/1087054714535951 [published Online First: 2014/05/31]

#### Gershby (2017)

- Gershby N, Meehan KB, Omer H, et al. Randomized clinical trial of mindfulness skills augmentation in parent training. *Child & Youth Care Forum* 2017;46(6):783-803. doi: <http://dx.doi.org/10.1007/s10566-017-9411-4>

#### Gu (2018)

- Gu Y, Xu G, Zhu Y. A Randomized Controlled Trial of Mindfulness-Based Cognitive Therapy for College Students With ADHD. *Journal of attention disorders* 2018;22(4):388-99. doi: 10.1177/1087054716686183 [published Online First: 2017/01/01]

#### Haffner (2006)

- Haffner J, Roos J, Goldstein N, et al. The effectiveness of body-oriented methods of therapy in the treatment of attention-deficit hyperactivity disorder (ADHD): Results of a controlled pilot study. [German]. *Zeitschrift fur Kinder- und Jugendpsychiatrie und Psychotherapie* 2006;34(1):37-47. doi: <http://dx.doi.org/10.1024/1422-4917.34.1.37>

#### Hoxhaj (2018)

- Hoxhaj E, Sadohara C, Borel P, et al. Mindfulness vs psychoeducation in adult ADHD: a randomized controlled trial. *European archives of psychiatry and clinical neuroscience* 2018 doi: 10.1007/s00406-018-0868-4 [published Online First: 2018/01/23]
- Bachmann K, Lam AP, Soros P, et al. Effects of mindfulness and psychoeducation on working memory in adult ADHD: A randomised, controlled fMRI study. *Behaviour research and therapy* 2018;106:47-56. doi: 10.1016/j.brat.2018.05.002
- Bachmann K, Soros P, Lam AP, et al. Differences in brain activation after mindfulness training in adults with ADHD: A fMRI study. *ADHD Attention Deficit and Hyperactivity Disorders* 2017;9 (1 Supplement):S29. doi: <http://dx.doi.org/10.1007/s12402-017-0224-y1>

#### Janssen (2018)

- Janssen L, Kan CC, Carpentier PJ, et al. Mindfulness-based cognitive therapy v. Treatment as usual in adults with adhd: A multicentre, single-blind, randomised controlled trial. *Psychological Medicine* 2018;No Pagination Specified. doi: <http://dx.doi.org/10.1017/S003329171800042915>.
- Heparik S, Janssen L, de Vries A, et al. The Efficacy of Adapted MBCT on Core Symptoms and Executive Functioning in Adults With ADHD: A Preliminary Randomized Controlled Trial. *Journal of attention disorders* 2015 doi: 10.1177/1087054715613587 [published Online First: 2015/11/22]
- Schoenberg PL, Heparik S, Kan CC, et al. Effects of mindfulness-based cognitive therapy on neurophysiological correlates of performance monitoring in adult attention-deficit/hyperactivity disorder. *Clinical neurophysiology : official journal of the International Federation of Clinical Neurophysiology* 2014;125(7):1407-16. doi:

10.1016/j.clinph.2013.11.031 [published Online First: 2014/01/01]

### **Jensen (2004)**

- Jensen PS, Kenny DT. The effects of yoga on the attention and behavior of boys with Attention-Deficit/ hyperactivity Disorder (ADHD). *Journal of attention disorders* 2004;7(4):205-16. doi: 10.1177/108705470400700403 [published Online First: 2004/10/19]

### **Kiani (2017)**

- Kiani B, Hadianfard H, Mitchell JT. The impact of mindfulness meditation training on executive functions and emotion dysregulation in an Iranian sample of female adolescents with elevated attention-deficit/hyperactivity disorder symptoms. *Australian Journal of Psychology* 2017;69(4):273-82. doi: <http://dx.doi.org/10.1111/ajpy.12148>

### **Kim (2014)**

- Kim K-U, 김수한, 최윤희. The Effect of Hatha yoga and Physical Activity on the attention of children and adolescents with ADHD tendencies. *Journal of Korea Entertainment Industry Association* 2014;8(3):527-37.

### **Lo (2017)**

- Lo HHM, Wong SWL, Wong JYH, et al. The Effects of Family-Based Mindfulness Intervention on ADHD Symptomology in Young Children and Their Parents: A Randomized Control Trial. *Journal of attention disorders* 2017:1087054717743330. doi: 10.1177/1087054717743330 [published Online First: 2017/12/01]

### **Mitchell (2017)**

- Mitchell JT, McIntyre EM, English JS, et al. A Pilot Trial of Mindfulness Meditation Training for ADHD in Adulthood: Impact on Core Symptoms, Executive Functioning, and Emotion Dysregulation. *Journal of attention disorders* 2017;21(13):1105-20. doi: 10.1177/1087054713513328 [published Online First: 2013/12/07]

### **Pettersson (2017)**

- Pettersson R, Soderstrom S, Edlund-Soderstrom K, et al. Internet-Based Cognitive Behavioral Therapy for Adults With ADHD in Outpatient Psychiatric Care. *Journal of attention disorders* 2017;21(6):508-21. doi: 10.1177/1087054714539998 [published Online First: 2014/06/28]

### **Sidhu (2015)**

- Sidhu P. The efficacy of mindfulness meditation in increasing the attention span in children with ADHD. *Dissertation Abstracts International: Section B: The Sciences and Engineering* 2015;75(7-B(E)):No Pagination Specified.

**SUPPLEMENTAL MATERIAL 4. Risk of bias for each of the studies included in the meta-analysis.**

| Study                          | FLEMING 2015 | GERSHY 2017 | GU 2018 | HAFFNER 2006 | HOXHAIJ 2018<br>BACHMANN 2018<br>BACHMANN 2017 | JANSSEN 2018<br>HEPARK 2015<br>SCHOENBERG<br>2014 |
|--------------------------------|--------------|-------------|---------|--------------|------------------------------------------------|---------------------------------------------------|
| <b>Random seq. generation</b>  | Unclear      | LOW         | Unclear | LOW          | LOW                                            | LOW                                               |
| <b>Allocation concealment</b>  | Unclear      | Unclear     | Unclear | Unclear      | Unclear                                        | LOW                                               |
| <b>Blind part</b>              | Unclear      | Unclear     | High    | Unclear      | Low                                            | High                                              |
| <b>Blind out ass</b>           | Low          | Unclear     | Low     | Unclear      | Low                                            | LOW                                               |
| <b>Incomplete outcome data</b> | Unclear      | Unclear     | Unclear | Unclear      | Unclear                                        | Unclear                                           |
| <b>Selective reporting</b>     | Unclear      | Unclear     | Unclear | Unclear      | Unclear                                        | Low                                               |
| <b>Other bias</b>              | LOW          | LOW         | LOW     | Unclear      | LOW                                            | LOW                                               |

| Study                          | JENSEN 2004 | KIANI 2017 | KIM 2014 | LO 2017 | MITCHELL 2017 | PETTERSON 2017 | SIDHU 2015 |
|--------------------------------|-------------|------------|----------|---------|---------------|----------------|------------|
| <b>Random seq. generation</b>  | Unclear     | Unclear    | Unclear  | LOW     | Unclear       | LOW            | Unclear    |
| <b>Allocation concealment</b>  | Unclear     | Unclear    | Unclear  | Unclear | Unclear       | Unclear        | Unclear    |
| <b>Blind part</b>              | Unclear     | High       | High     | High    | High          | High           | Unclear    |
| <b>Blind out ass</b>           | Unclear     | Unclear    | Unclear  | Unclear | High          | Low            | Unclear    |
| <b>Incomplete outcome data</b> | Unclear     | LOW        | LOW      | Unclear | Unclear       | Unclear        | Unclear    |
| <b>Selective reporting</b>     | Unclear     | Unclear    | Unclear  | Low     | Unclear       | Unclear        | Unclear    |
| <b>Other bias</b>              | Unclear     | Unclear    | LOW      | LOW     | LOW           | LOW            | LOW        |

## SUPPLEMENTAL MATERIAL 5. Forest plots.

### 1. ADHD symptoms COMBINED OR inattention OR hyperactivity/ impulsivity (children)

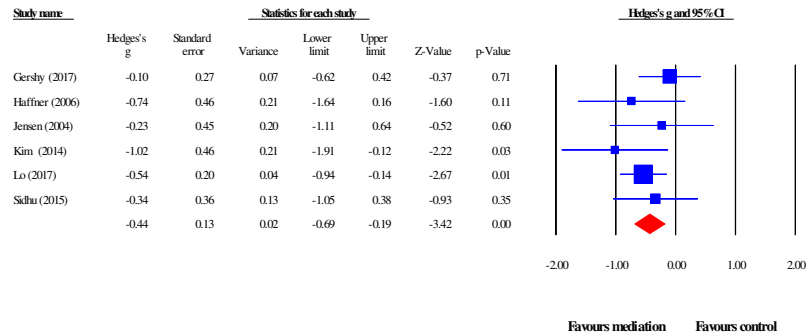

Egger's regression intercept

|                           |        |
|---------------------------|--------|
| Intercept                 | -0.607 |
| Standard error            | 1.254  |
| 95% lower limit(2-tailed) | -4.088 |
| 95% upper limit(2-tailed) | 2.874  |
| t-value                   | 0.484  |
| df                        | 4      |
| P-value(1-tailed)         | 0.327  |
| P-value(2-tailed)         | 0.654  |

## 2. ADHD symptoms COMBINED OR inattention OR hyperactivity/ impulsivity (children, removing Jensen 2004)

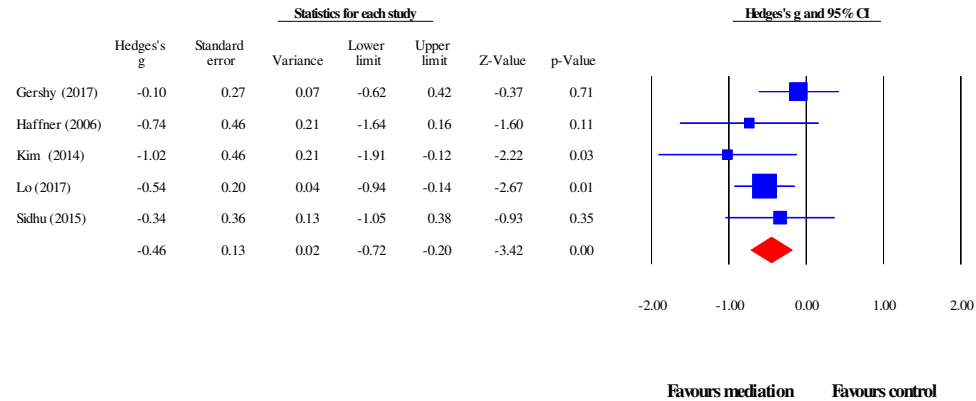

Egger's regression intercept

|                           |        |
|---------------------------|--------|
| Intercept                 | -1.083 |
| Standard error            | 1.483  |
| 95% lower limit(2-tailed) | -5.803 |
| 95% upper limit(2-tailed) | 3.637  |
| t-value                   | 0.730  |
| df                        | 3      |
| P-value(1-tailed)         | 0.259  |
| P-value(2-tailed)         | 0.518  |



### 3. ADHD symptoms COMBINED OR inattention OR hyperactivity/ impulsivity (children, removing Gershy 2017)

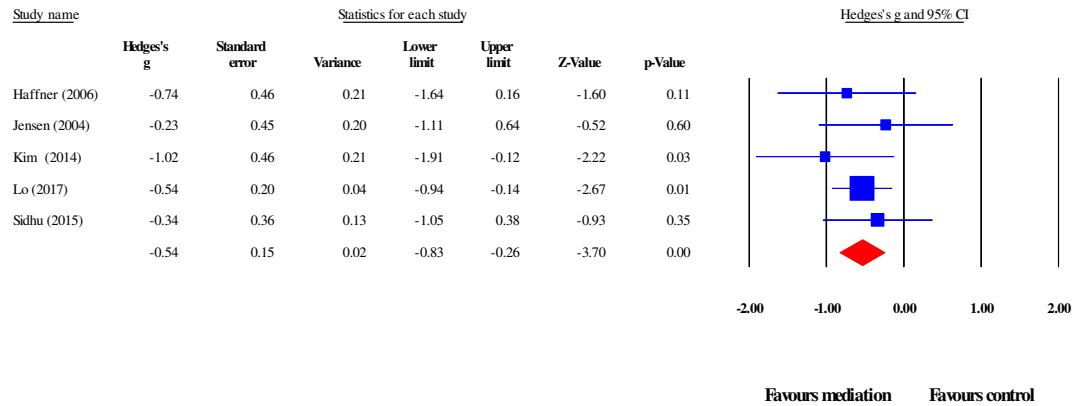

Egger's regression intercept

|                           |        |
|---------------------------|--------|
| Intercept                 | -0.306 |
| Standard error            | 1.045  |
| 95% lower limit(2-tailed) | -3.633 |
| 95% upper limit(2-tailed) | 3.021  |
| t-value                   | 0.292  |
| df                        | 3      |
| P-value(1-tailed)         | 0.394  |
| P-value(2-tailed)         | 0.788  |

#### 4. Inattention (children)

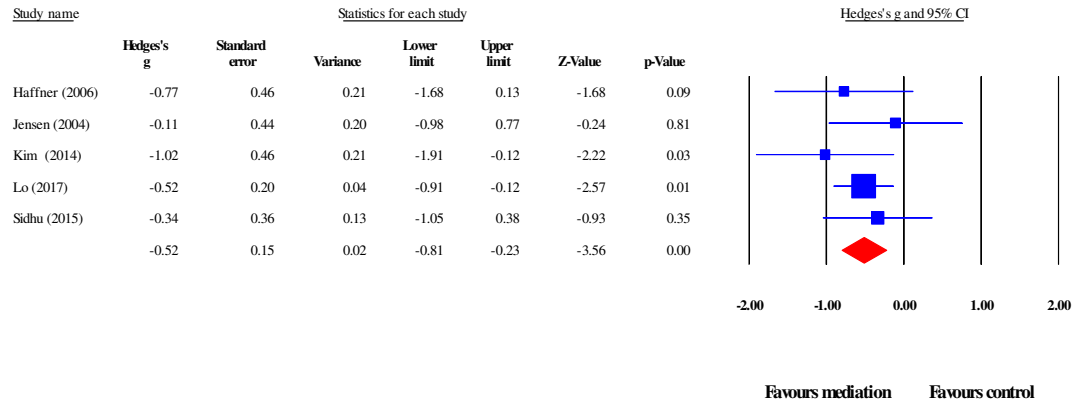

Egger's regression intercept

|                           |        |
|---------------------------|--------|
| Intercept                 | -0.294 |
| Standard error            | 1.179  |
| 95% lower limit(2-tailed) | -4.047 |
| 95% upper limit(2-tailed) | 3.458  |
| t-value                   | 0.250  |
| df                        | 3      |
| P-value(1-tailed)         | 0.409  |
| P-value(2-tailed)         | 0.818  |

### 5. Inattention (children, removing Jensen 2004)

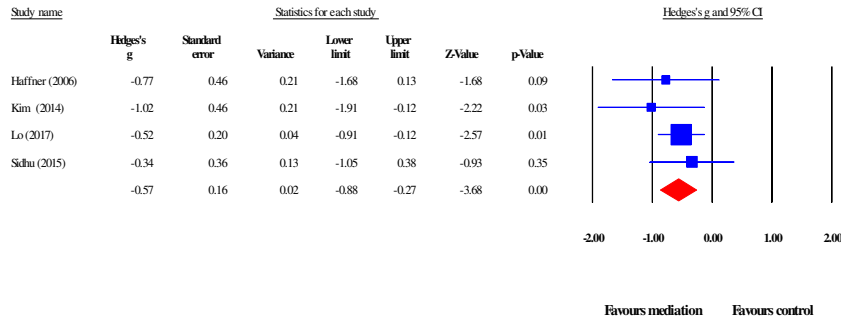

Egger's regression intercept  
 Intercept -1.002  
 Standard error 1.053  
 95% lower limit(2-tailed) -5.532  
 95% upper limit(2-tailed) 3.528  
 t-value 0.951  
 df 2  
 P-value(1-tailed) 0.221  
 P-value(2-tailed) 0.442

## 6. Hyperactivity/impulsivity (children)

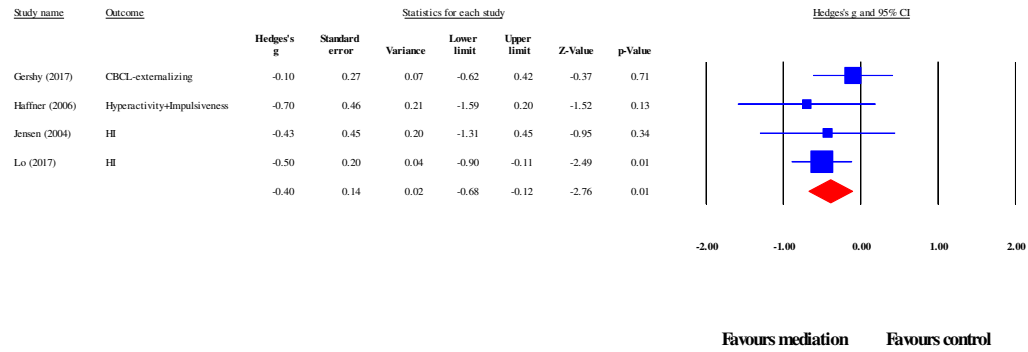

Egger's regression intercept

|                           |        |
|---------------------------|--------|
| Intercept                 | -0.300 |
| Standard error            | 1.469  |
| 95% lower limit(2-tailed) | -6.622 |
| 95% upper limit(2-tailed) | 6.022  |
| t-value                   | 0.204  |
| df                        | 2      |
| P-value(1-tailed)         | 0.428  |
| P-value(2-tailed)         | 0.857  |

### 7. Hyperactivity/impulsivity (children, removing Jensen 2004)

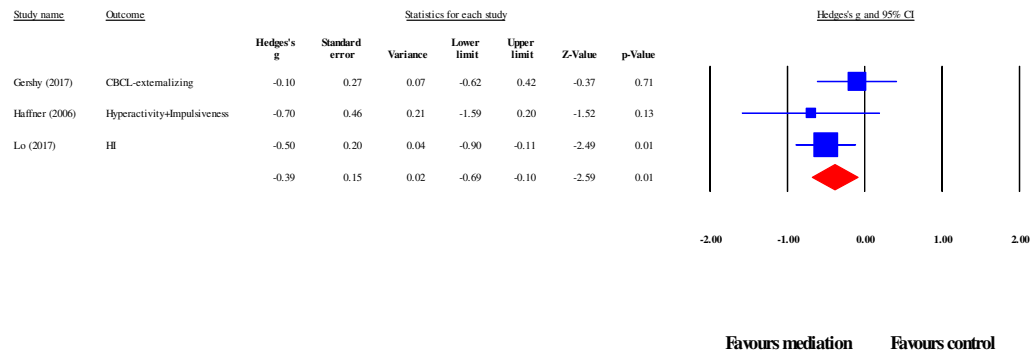

|                              |         |
|------------------------------|---------|
| Egger's regression intercept |         |
| Intercept                    | -0.381  |
| Standard error               | 2.670   |
| 95% lower limit(2-tailed)    | -34.308 |
| 95% upper limit(2-tailed)    | 33.546  |
| t-value                      | 0.142   |
| df                           | 1       |
| P-value(1-tailed)            | 0.454   |
| P-value(2-tailed)            | 0.909   |

## 8. Hyperactivity/impulsivity (children, removing Gershly 2017)

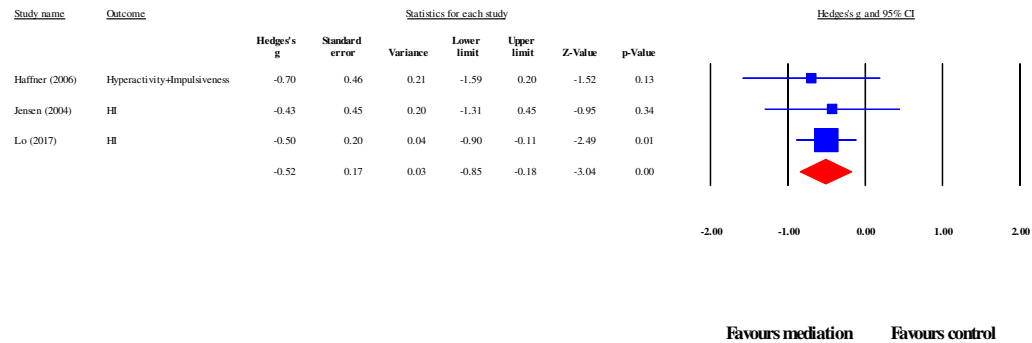

Egger's regression intercept

|                           |        |
|---------------------------|--------|
| Intercept                 | -0.238 |
| Standard error            | 0.622  |
| 95% lower limit(2-tailed) | -8.153 |
| 95% upper limit(2-tailed) | 7.675  |
| t-value                   | 0.382  |
| df                        | 1      |
| P-value(1-tailed)         | 0.383  |
| P-value(2-tailed)         | 0.767  |

### 9. Neuropsychological measures of inhibition (children)

| Study name   | Statistics for each study |                |          |             |             |         |         |
|--------------|---------------------------|----------------|----------|-------------|-------------|---------|---------|
|              | Hedges's g                | Standard error | Variance | Lower limit | Upper limit | Z-Value | p-Value |
| Kiani (2017) | -0.07                     | 0.36           | 0.13     | -0.76       | 0.63        | -0.19   | 0.85    |
| Lo (2017)    | -0.10                     | 0.20           | 0.04     | -0.49       | 0.29        | -0.48   | 0.63    |
| Sidhu (2015) | -1.06                     | 0.39           | 0.15     | -1.82       | -0.30       | -2.74   | 0.01    |
|              | -0.35                     | 0.29           | 0.08     | -0.91       | 0.21        | -1.22   | 0.22    |

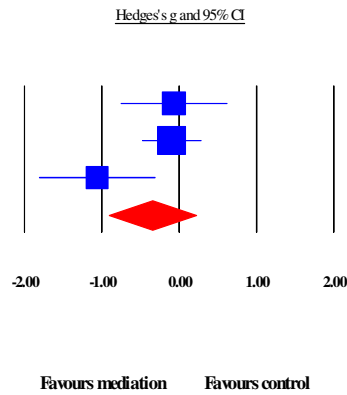

Egger's regression intercept  
 Intercept -2.857  
 Standard error 3.297  
 95% lower limit(2-tailed) -44.751  
 95% upper limit(2-tailed) 339.035  
 t-value 0.867  
 df 1  
 P-value(1-tailed) 0.272  
 P-value(2-tailed) 0.545

### 10. Neuropsychological measures of inattention (children)

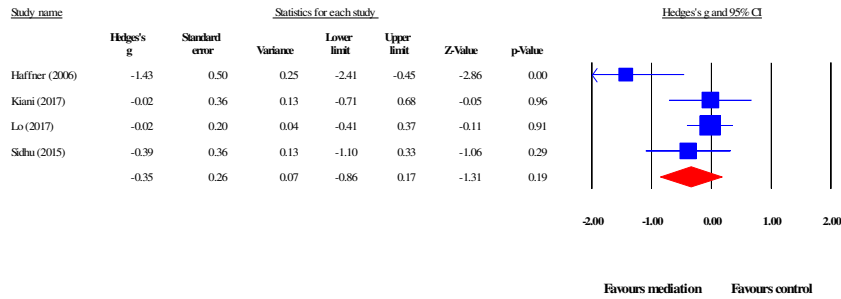

Egger's regression intercept

|                           |         |
|---------------------------|---------|
| Intercept                 | -3.160  |
| Standard error            | 1.725   |
| 95% lower limit(2-tailed) | -10.581 |
| 95% upper limit(2-tailed) | 4.260   |
| t-value                   | 1.832   |
| df                        | 2       |
| P-value(1-tailed)         | 0.104   |
| P-value(2-tailed)         | 0.208   |



**11. ADHD symptoms COMBINED OR inattention OR hyperactivity/ impulsivity (children, studies with with waiting list only)**

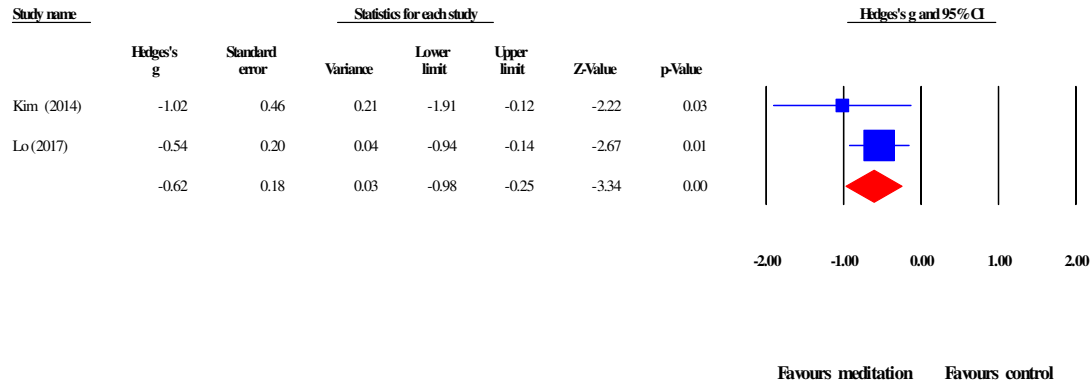

**12. ADHD symptoms COMBINED OR inattention OR hyperactivity/ impulsivity (adults)**

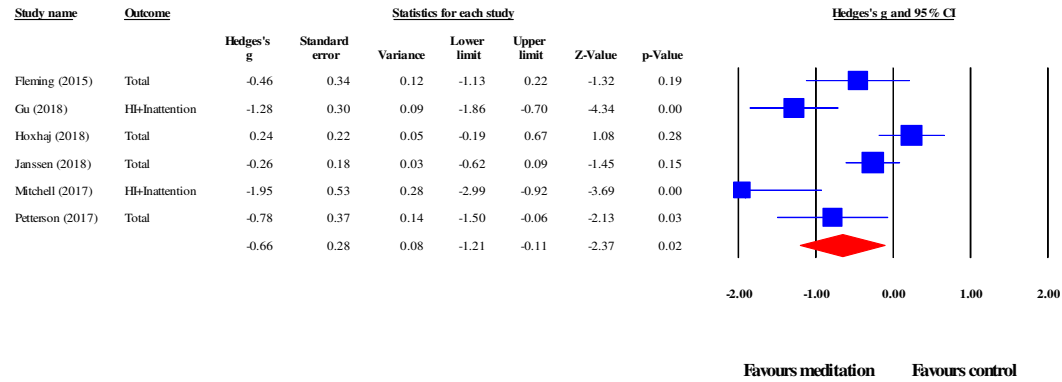

Egger's regression intercept  
 Intercept -4.793  
 Standard error 2.261  
 95% lower limit(2-tailed) -11.071  
 95% upper limit(2-tailed) 1.484  
 t-value 2.120  
 df 4  
 P-value(1-tailed) 0.050  
 P-value(2-tailed) 0.101

**13. ADHD symptoms COMBINED OR inattention OR hyperactivity/ impulsivity (adults, removing Fleming 2015 and Petterson 2017)**

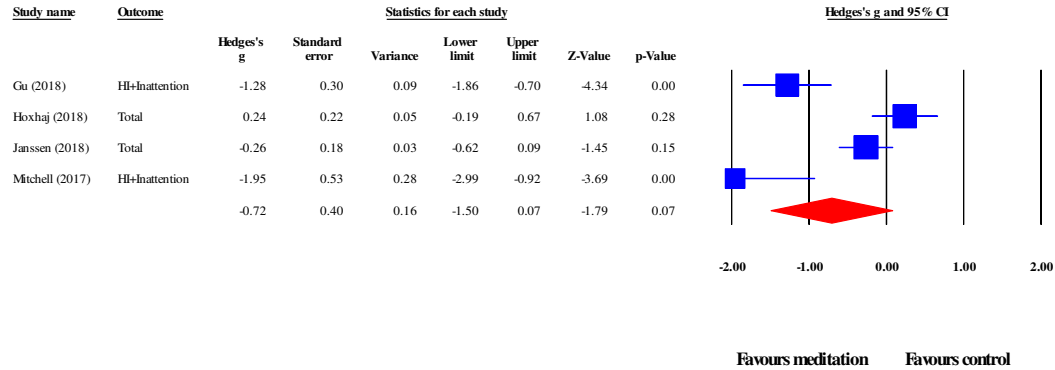

|                              |         |
|------------------------------|---------|
| Egger's regression intercept |         |
| Intercept                    | -6.012  |
| Standard error               | 3.457   |
| 95% lower limit(2-tailed)    | -20.888 |
| 95% upper limit(2-tailed)    | 8.863   |
| t-value                      | 1.739   |
| df                           | 2       |
| P-value(1-tailed)            | 0.112   |
| P-value(2-tailed)            | 0.224   |

## 14. Inattention (adults)

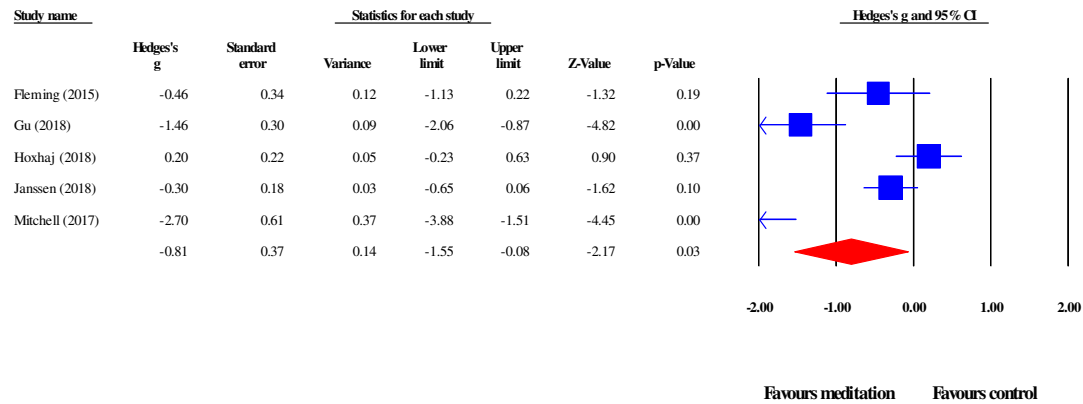

Egger's regression intercept

|                           |         |
|---------------------------|---------|
| Intercept                 | -5.734  |
| Standard error            | 2.813   |
| 95% lower limit(2-tailed) | -14.687 |
| 95% upper limit(2-tailed) | 3.217   |
| t-value                   | 2.038   |
| df                        | 3       |
| P-value(1-tailed)         | 0.067   |
| P-value(2-tailed)         | 0.134   |

**15. Inattention (adults, removing Fleming 2015)**

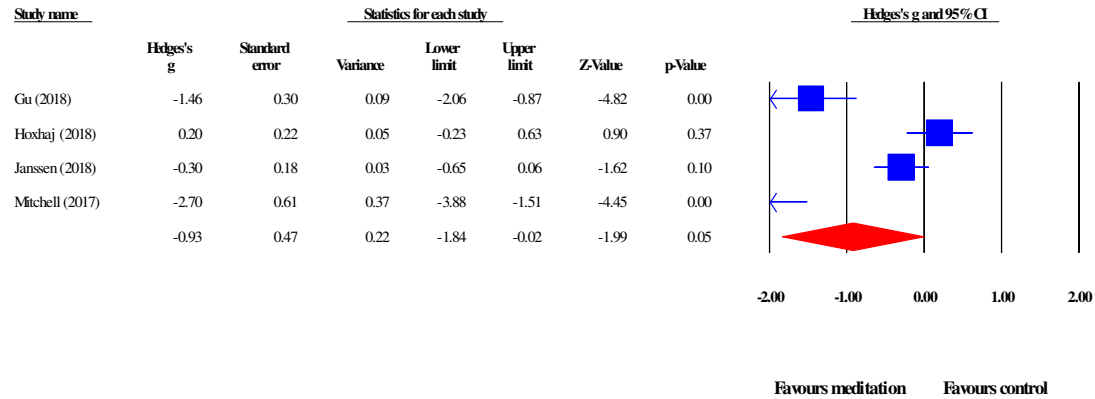

Egger's regression intercept  
 Intercept -6.739  
 Standard error 3.272  
 95% lower limit(2-tailed) -20.819  
 95% upper limit(2-tailed) 7.340  
 t-value 2.059  
 df 2  
 P-value(1-tailed) 0.087  
 P-value(2-tailed) 0.175

### 16. Hyperactivity/impulsivity (adults)

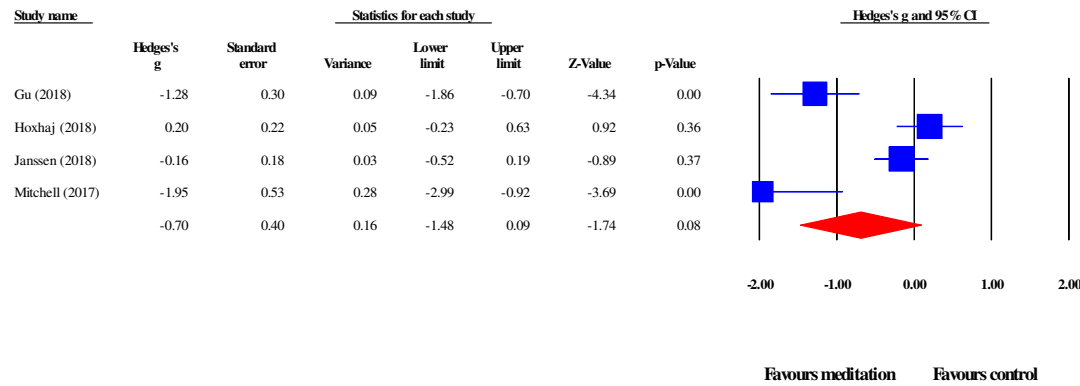

Egger's regression intercept

|                           |         |
|---------------------------|---------|
| Intercept                 | -6.329  |
| Standard error            | 3.149   |
| 95% lower limit(2-tailed) | -19.880 |
| 95% upper limit(2-tailed) | 7.220   |
| t-value                   | 2.009   |
| df                        | 2       |
| P-value(1-tailed)         | 0.091   |
| P-value(2-tailed)         | 0.182   |



## 18. Neuropsychological measures of inattention (adults)

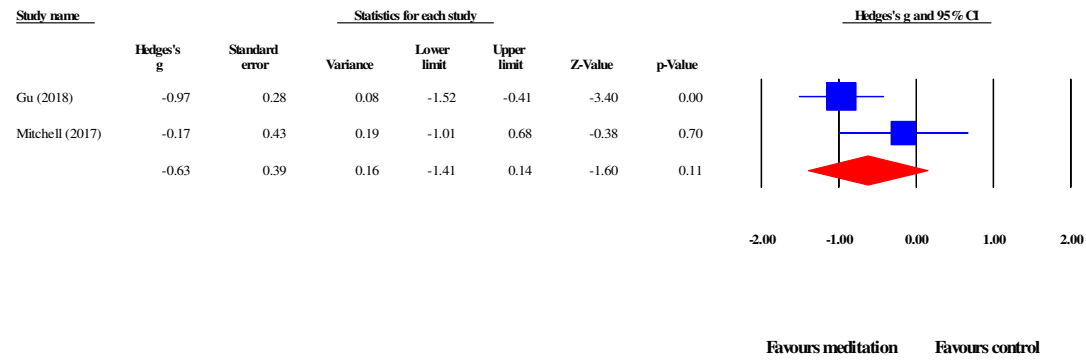



### 19. Neuropsychological measures of working memory (adults)

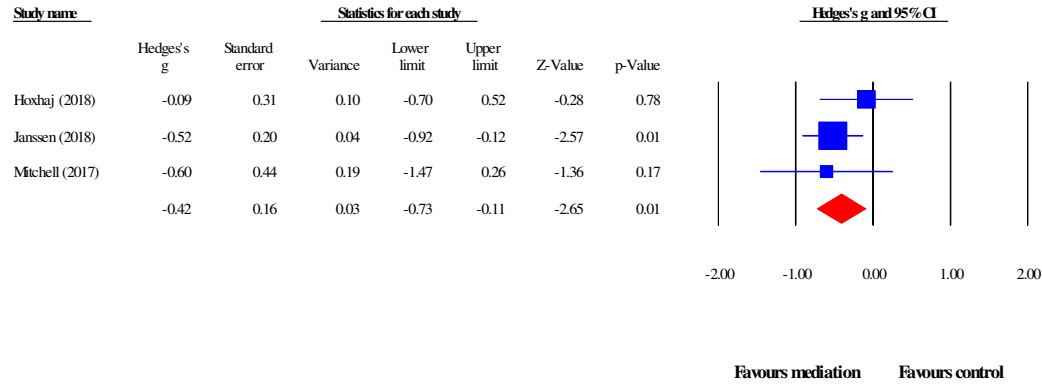

Egger's regression intercept

|                           |         |
|---------------------------|---------|
| Intercept                 | 0.531   |
| Standard error            | 2.316   |
| 95% lower limit(2-tailed) | -28.897 |
| 95% upper limit(2-tailed) | 29.958  |
| t-value                   | 0.229   |
| df                        | 1       |
| P-value(1-tailed)         | 0.428   |
| P-value(2-tailed)         | 0.857   |

## 20. ADHD symptoms COMBINED OR inattention OR hyperactivity/ impulsivity (adults, studies with waiting list only)

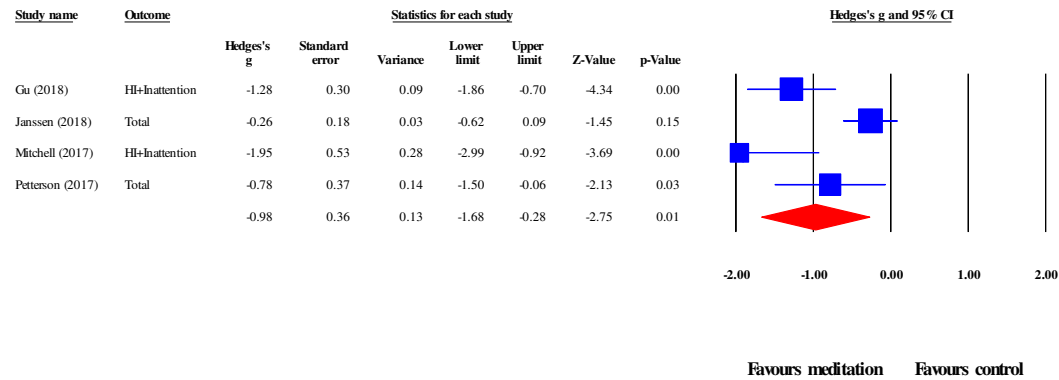

Egger's regression intercept

|                           |         |
|---------------------------|---------|
| Intercept                 | -4.663  |
| Standard error            | 1.786   |
| 95% lower limit(2-tailed) | -12.350 |
| 95% upper limit(2-tailed) | 3.023   |
| t-value                   | 2.610   |
| df                        | 2       |
| P-value(1-tailed)         | 0.060   |
| P-value(2-tailed)         | 0.120   |

**SUPPLEMENTAL MATERIAL 6. Funnel plots****1. ADHD symptoms COMBINED OR inattention OR hyperactivity/ impulsivity (children)**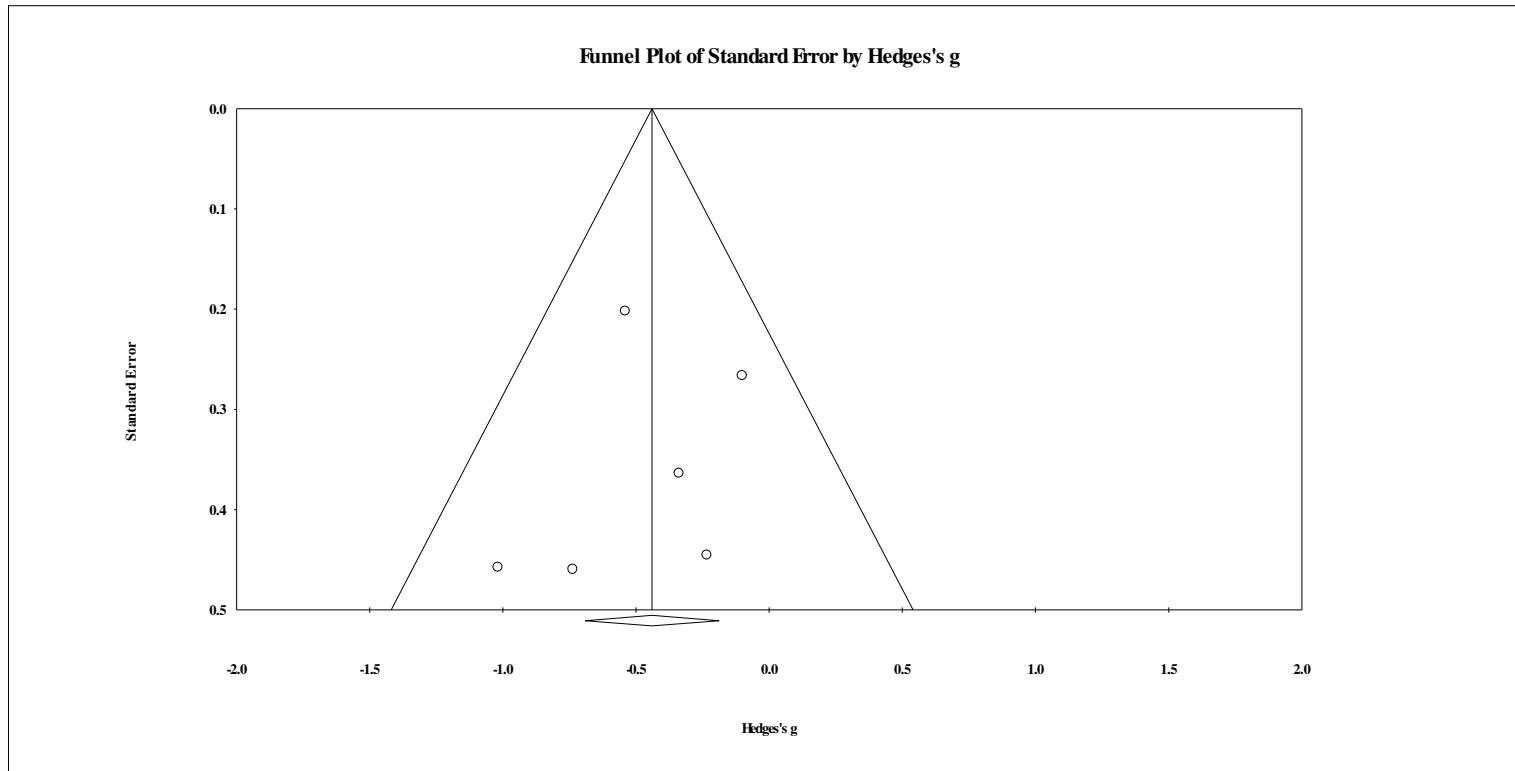

**2. ADHD symptoms COMBINED OR inattention OR hyperactivity/ impulsivity (children, removing Jensen 2004)**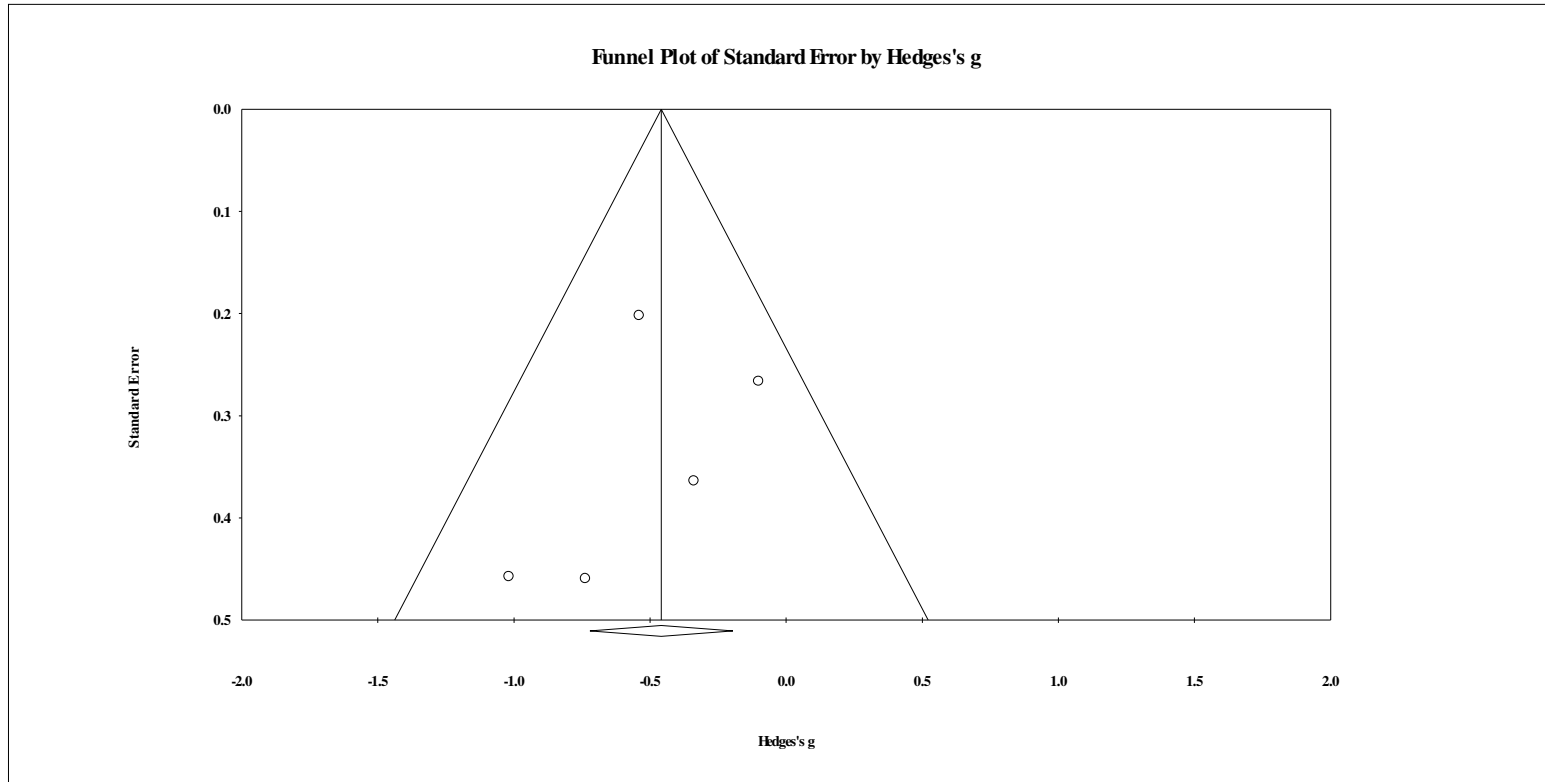

### 3. ADHD symptoms COMBINED OR inattention OR hyperactivity/ impulsivity (children, removing Gershy 2017)

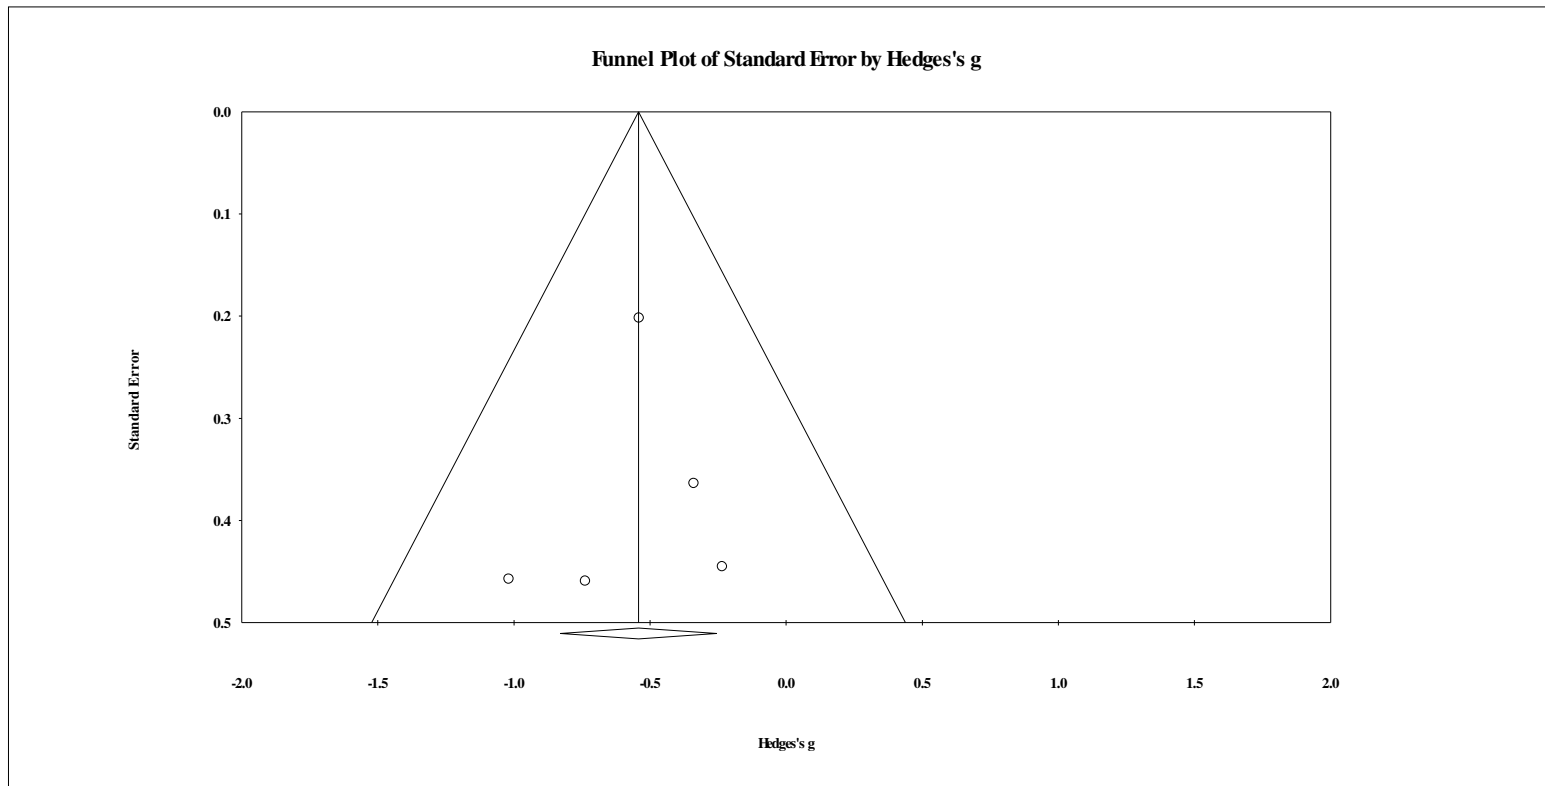

4. Inattention (children)

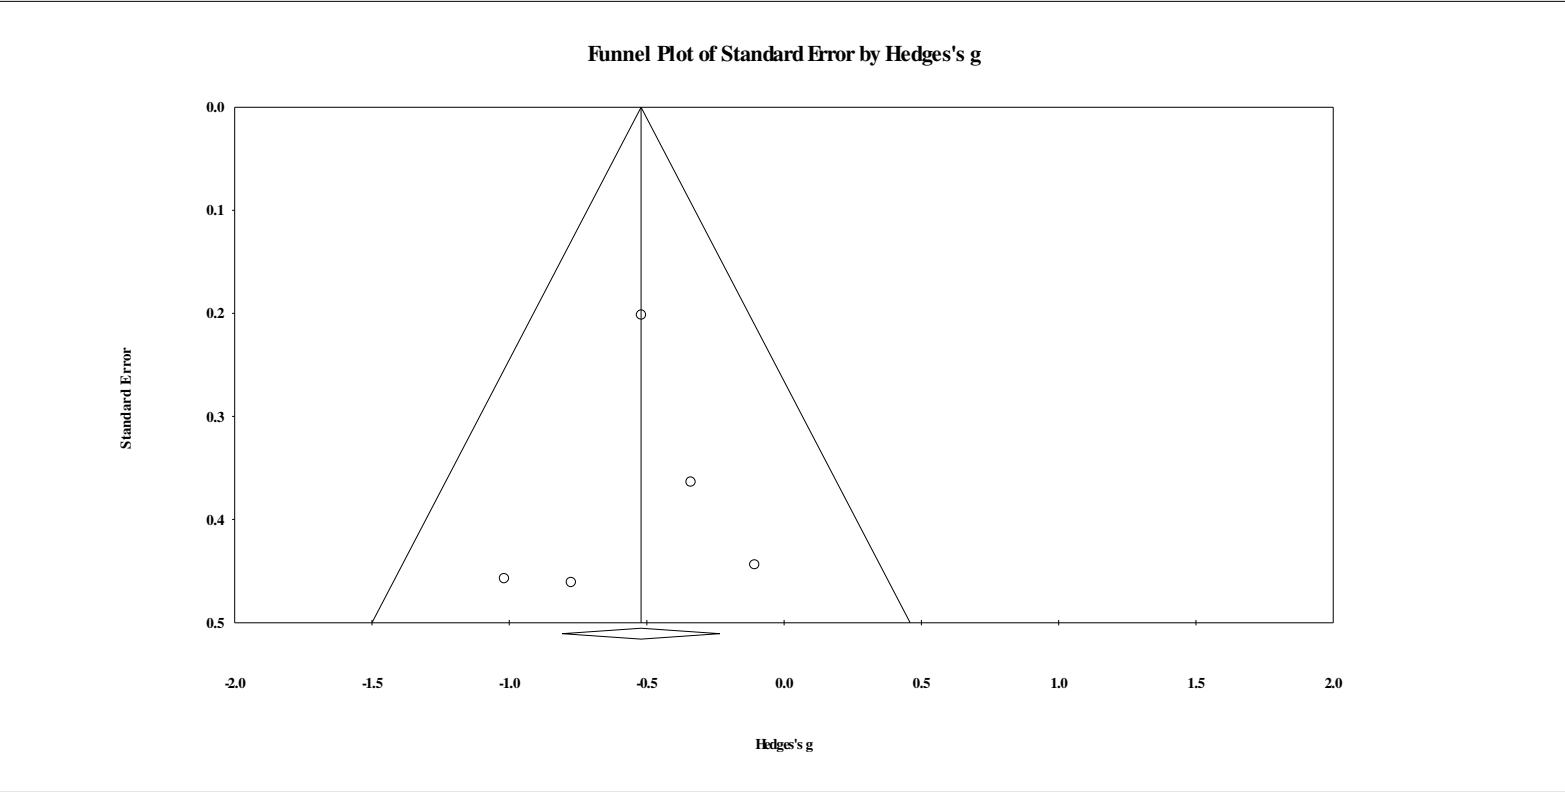

### 5. Inattention (children, removing Jensen 2004)

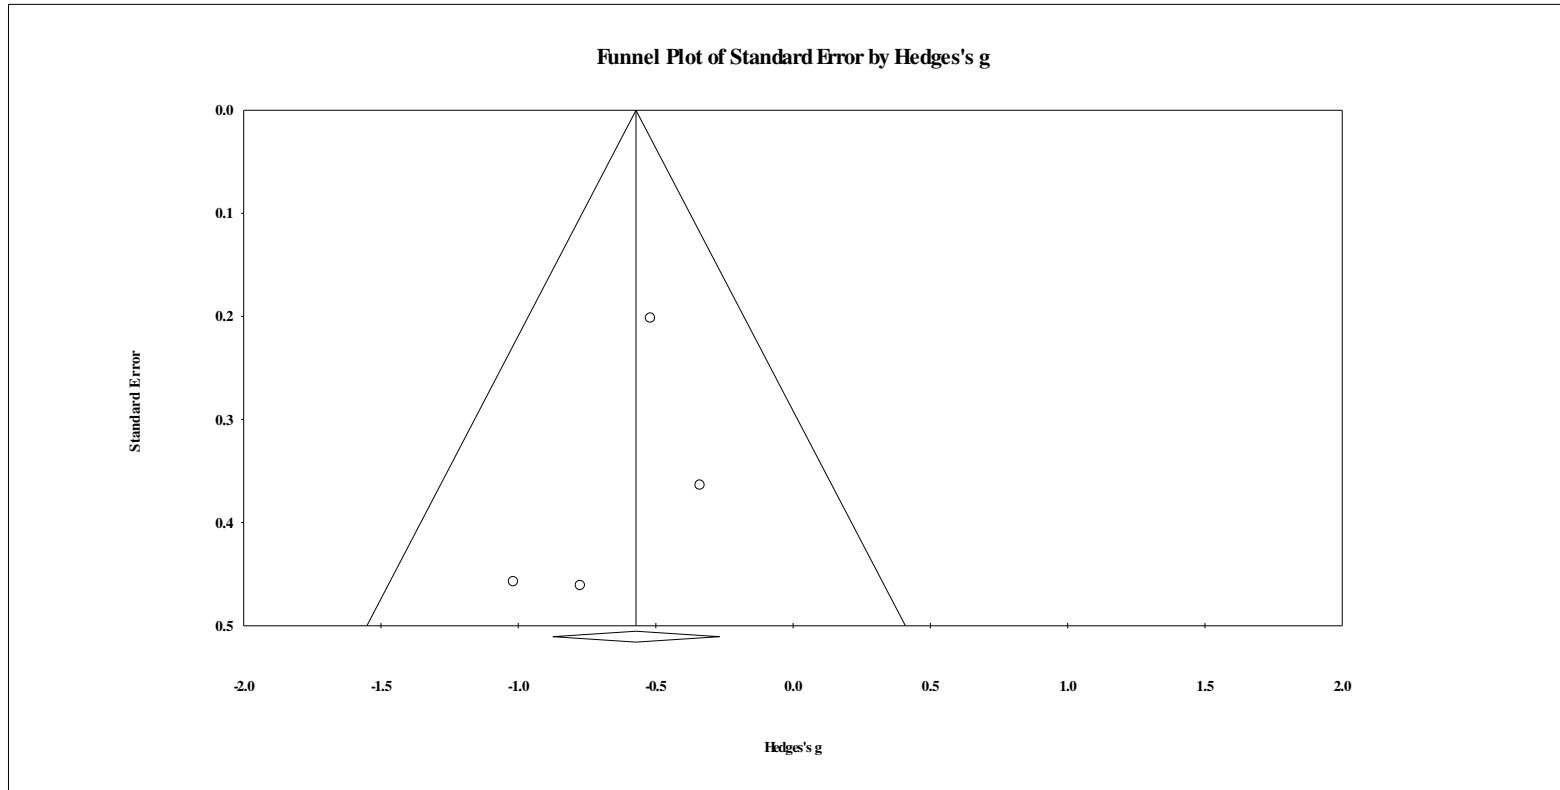

6. Hyperactivity/impulsivity (children)

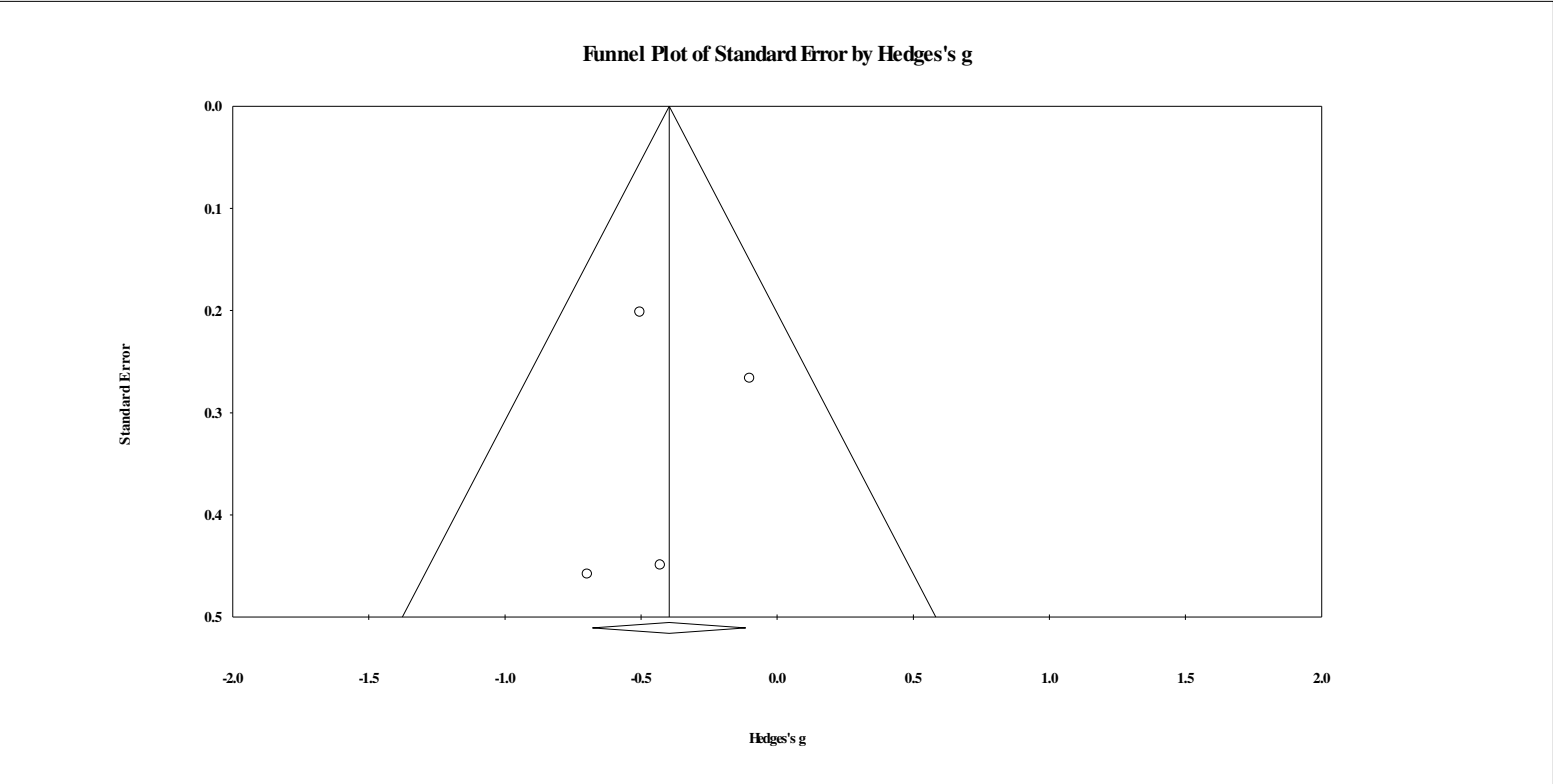



**7. Hyperactivity/impulsivity (children, removing Jensen 2004)**

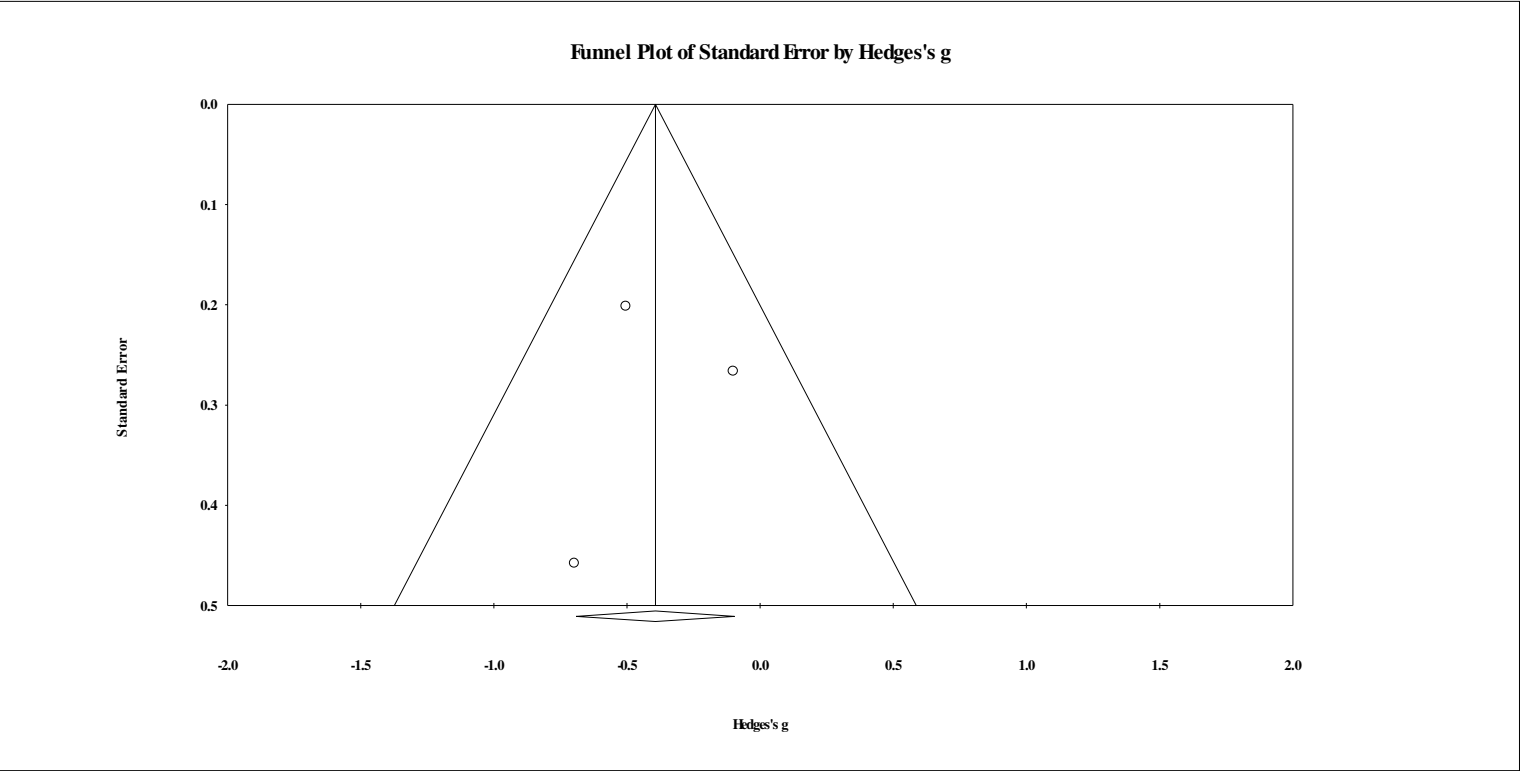

8. Hyperactivity/impulsivity (children, removing Gershy 2017)

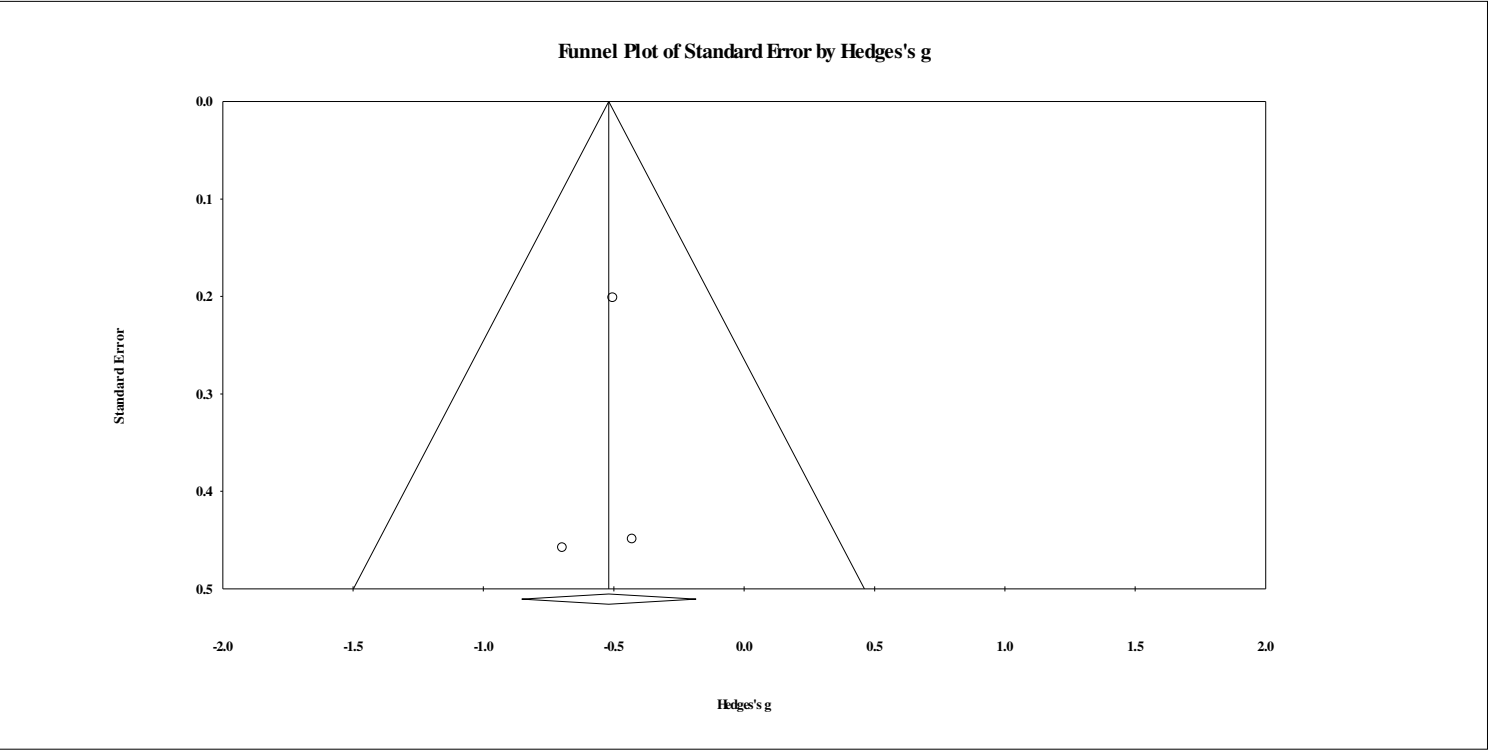

9. Neuropsychological measures of inhibition (children)

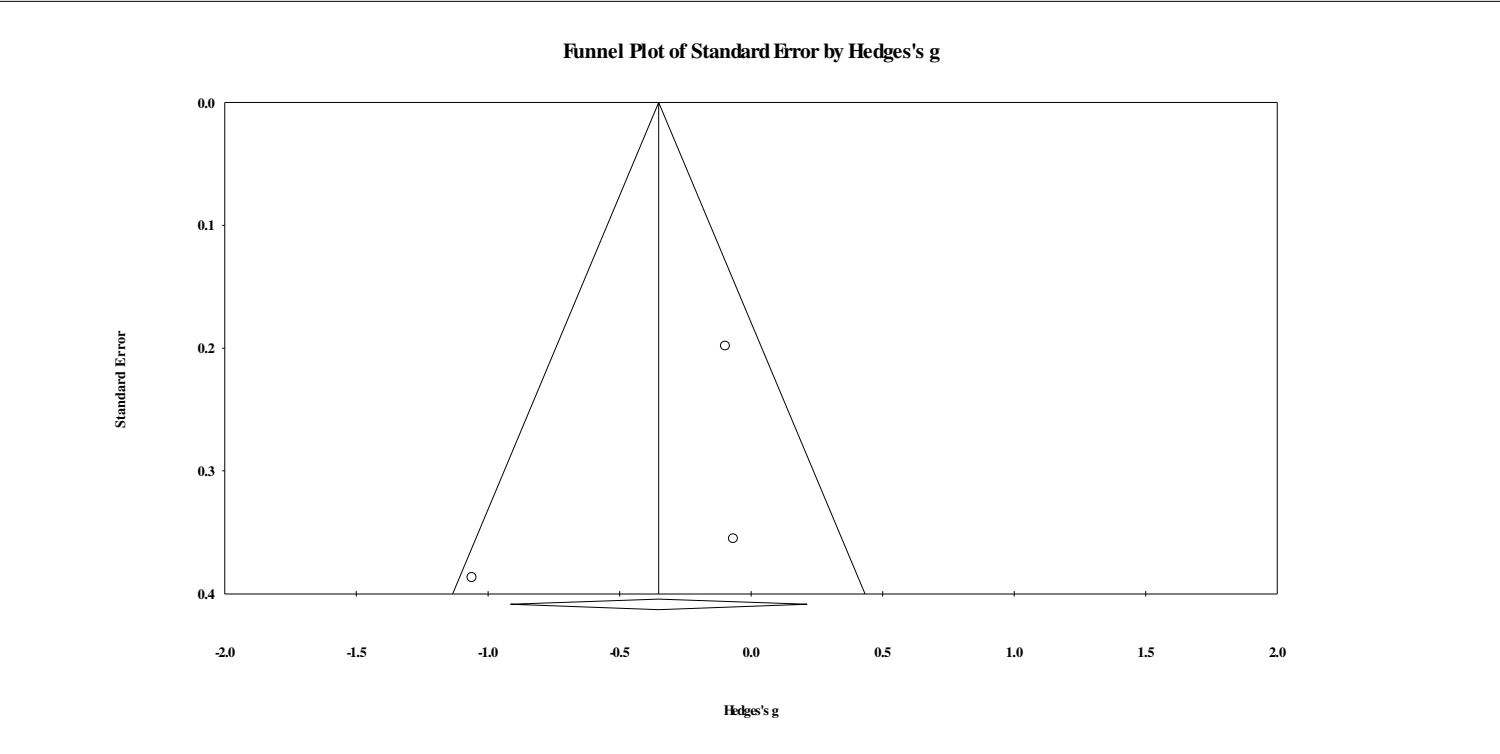

## 10. Neuropsychological measures of inattention (children)

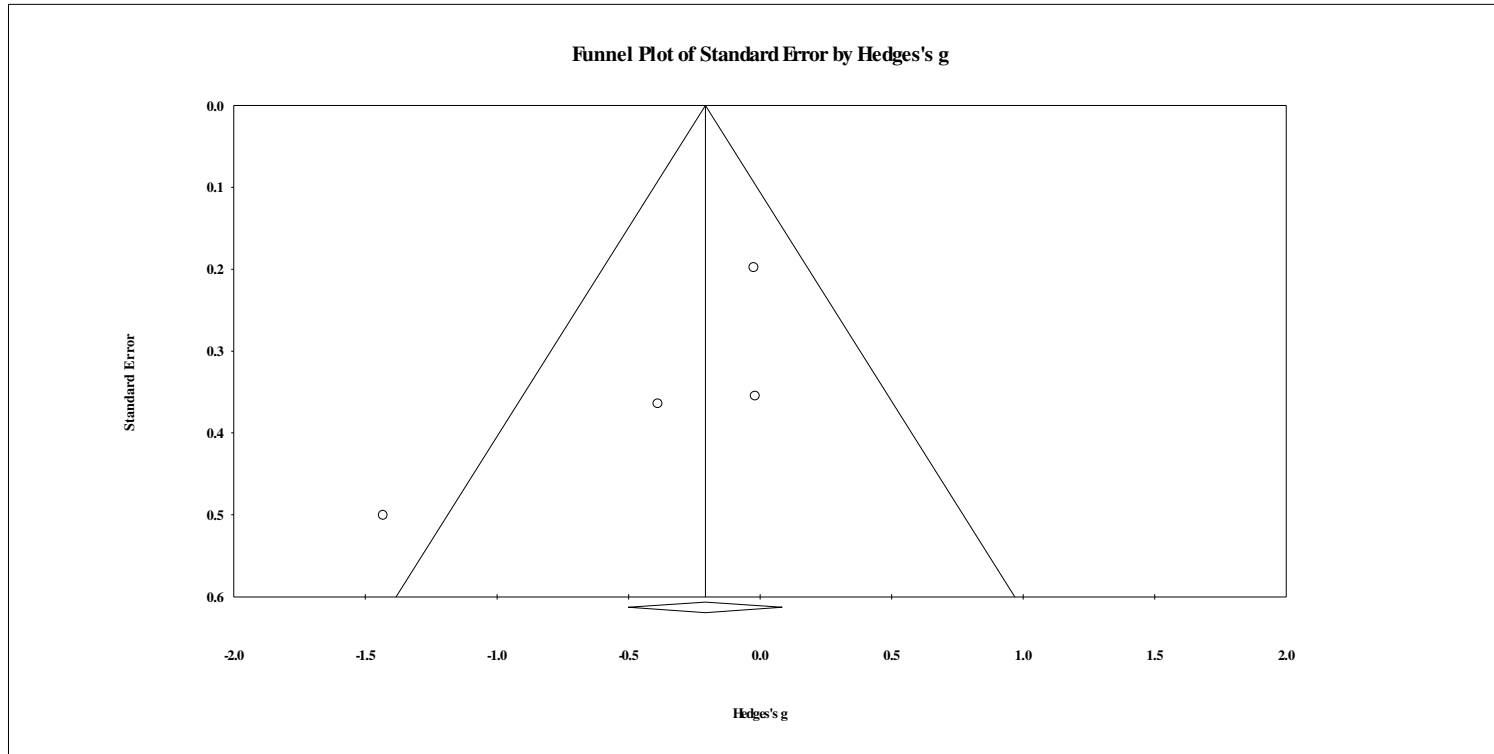

## 11. ADHD symptoms COMBINED OR inattention OR hyperactivity/ impulsivity (children, studies with with waiting list only)

N/A

**12. ADHD symptoms COMBINED OR inattention OR hyperactivity/ impulsivity (adults)**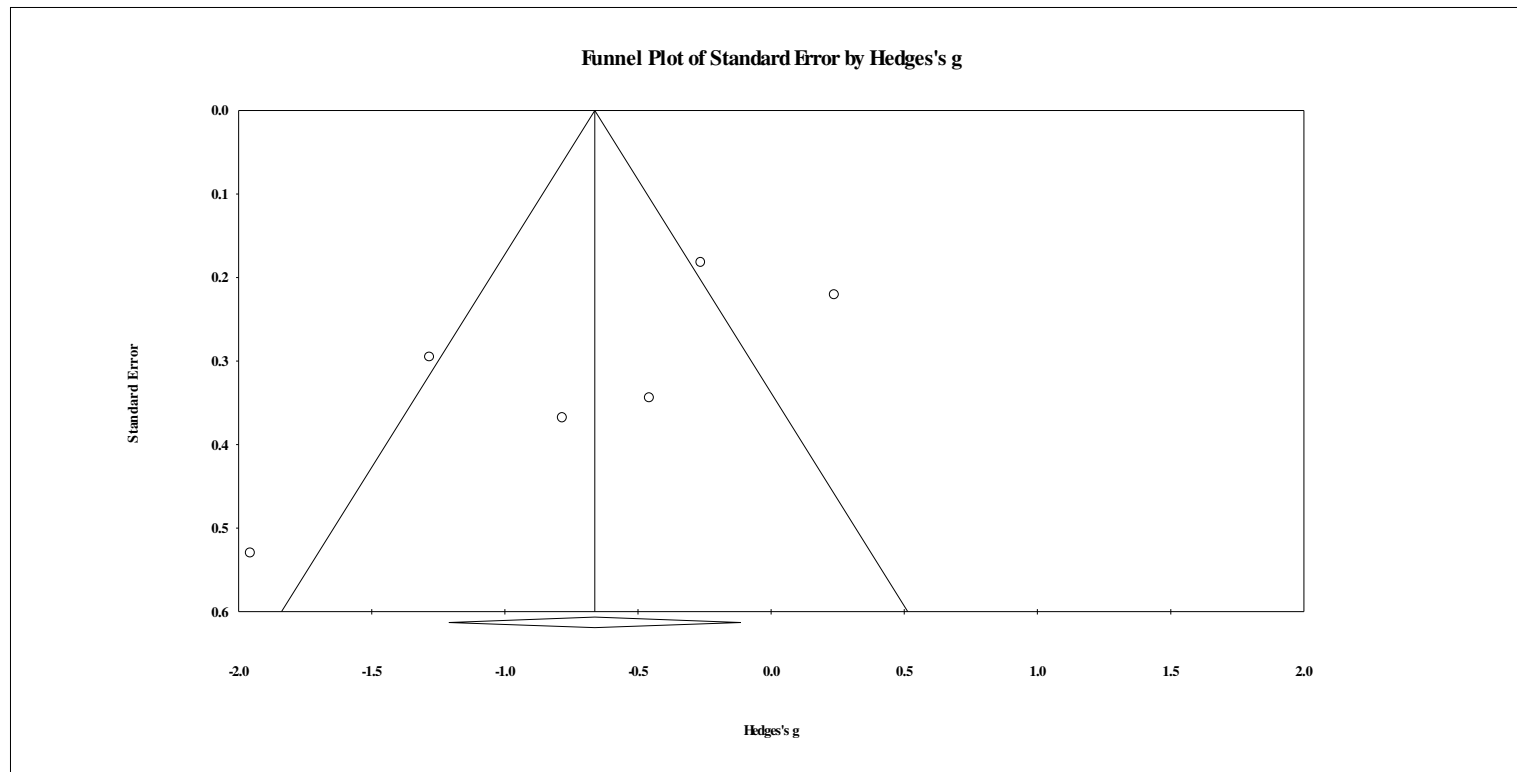

13. AHD symptoms COMBINED OR inattention OR hyperactivity/ impulsivity (adults, removing Fleming 2015 and Petterson 2017)

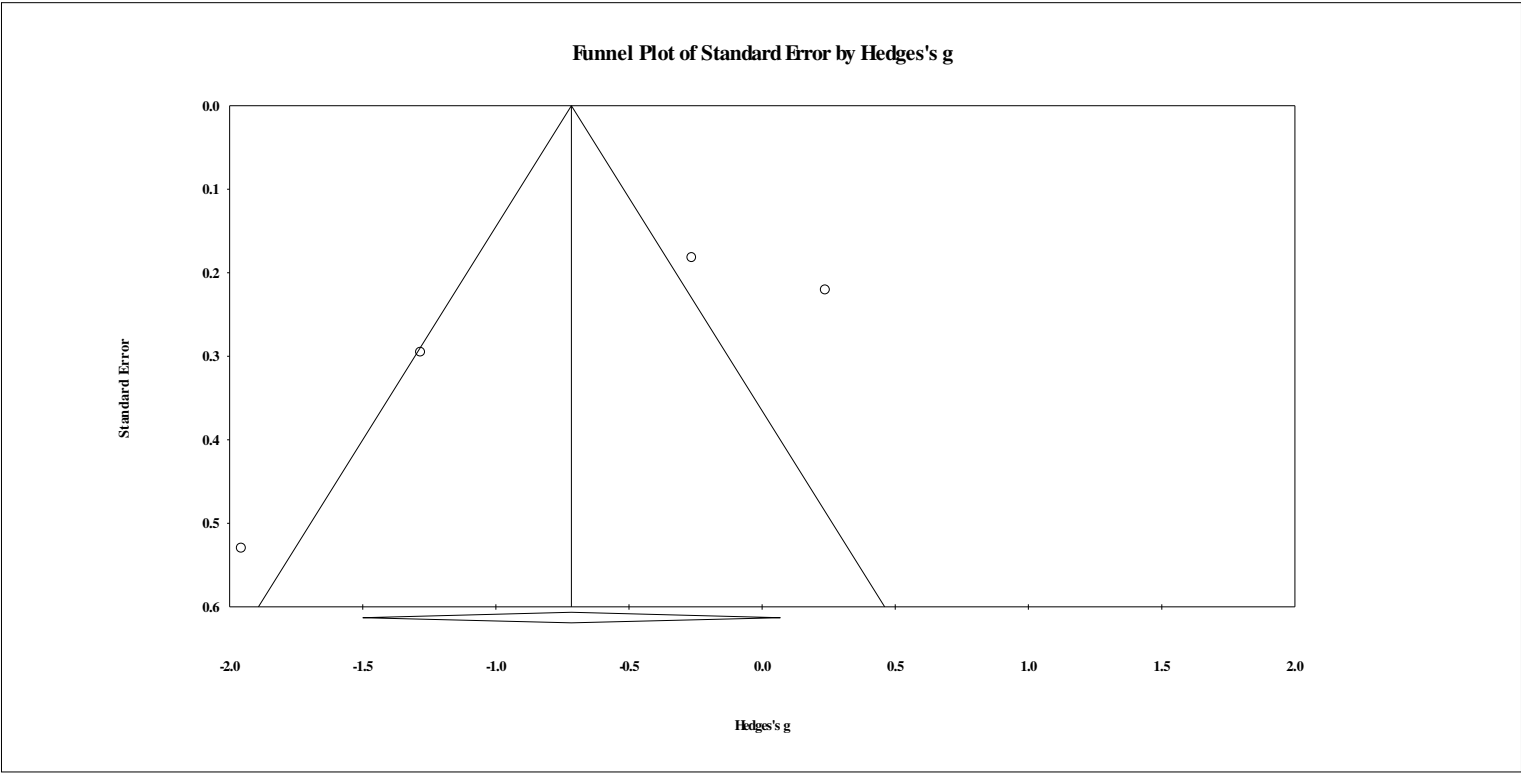

**14. Inattention (adults)**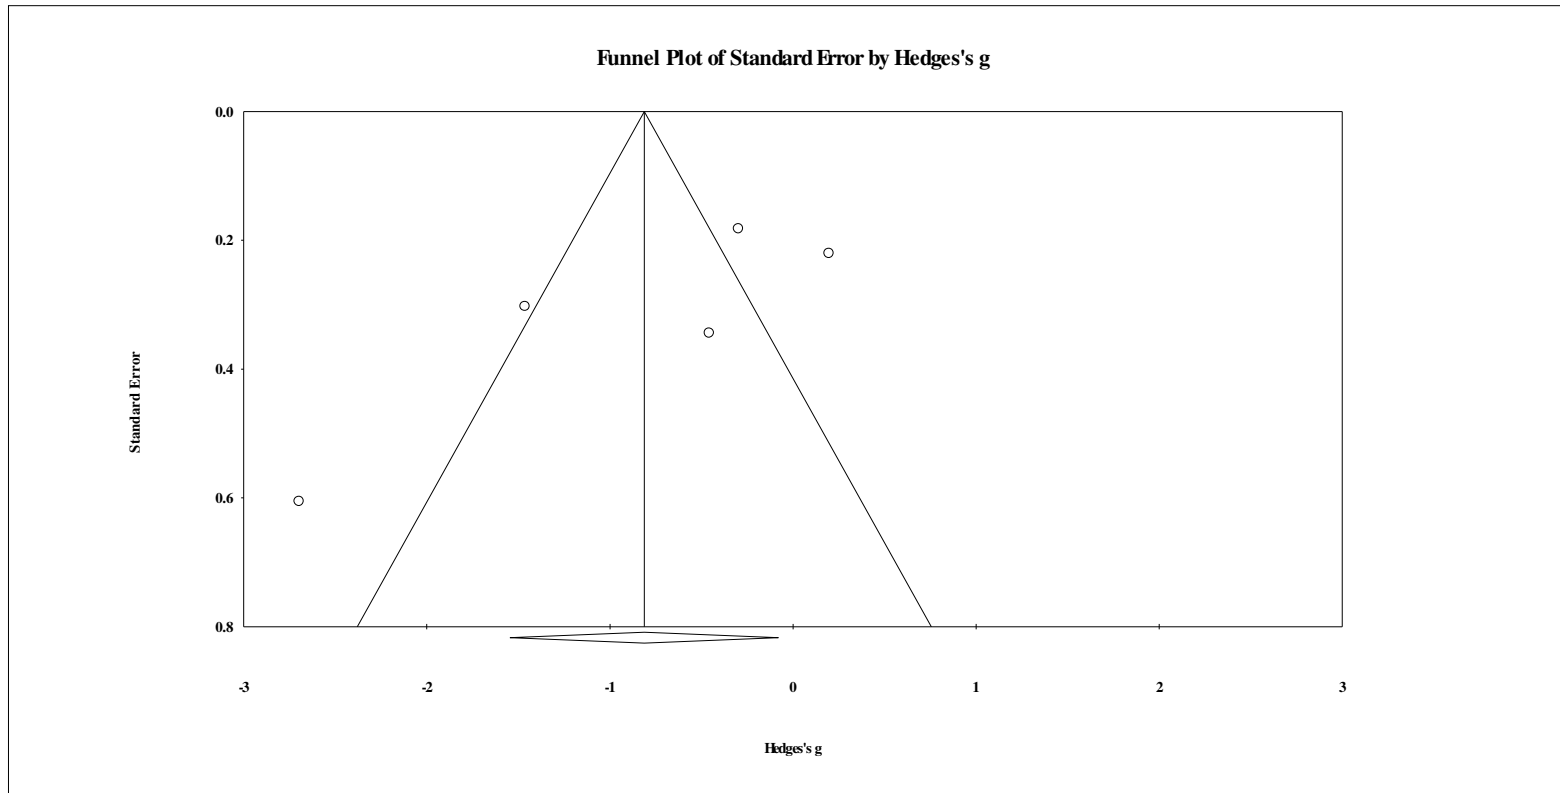

**15. Inattention (adults, removing Fleming 2015 )**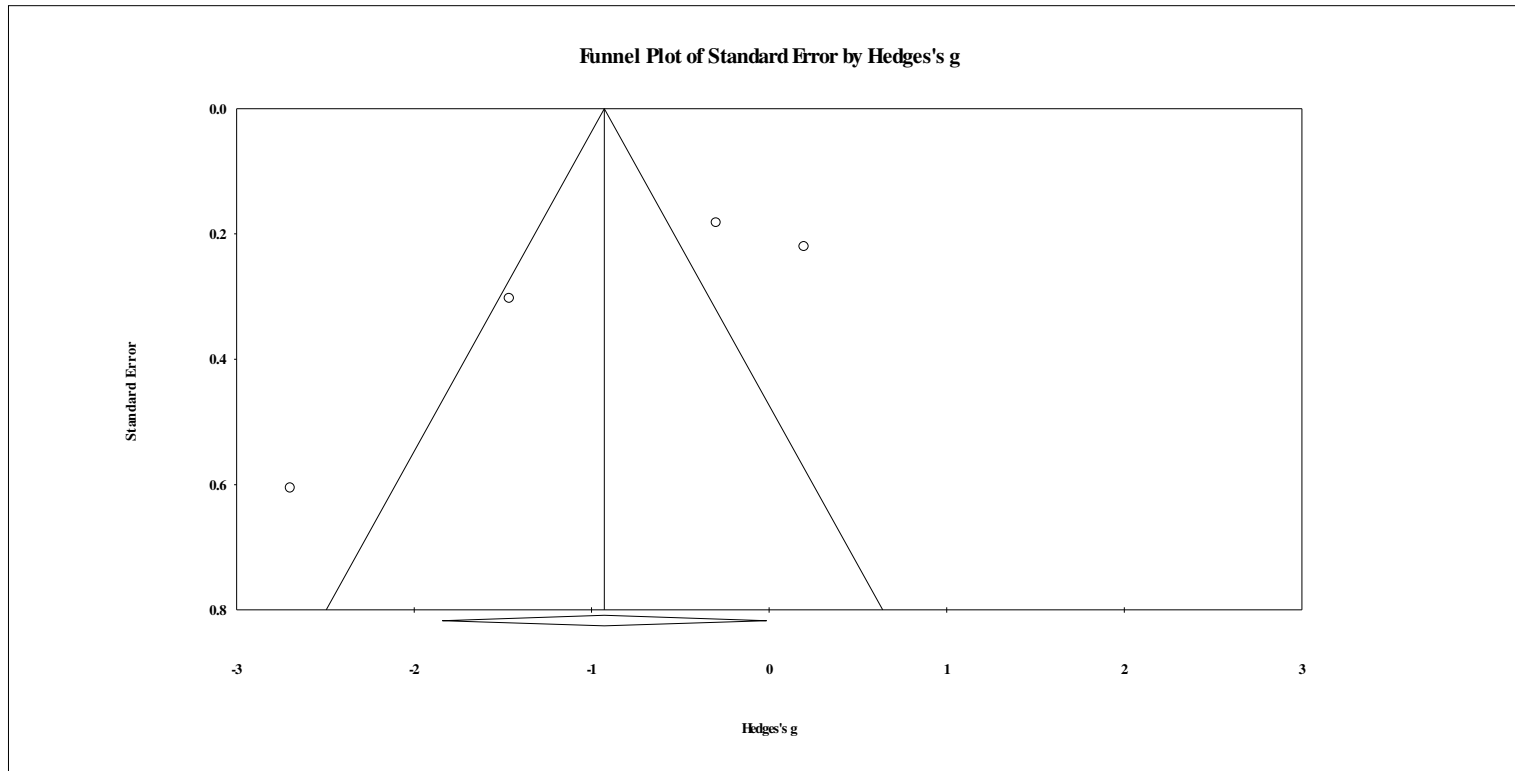



## 16. Hyperactivity/impulsivity (adults)

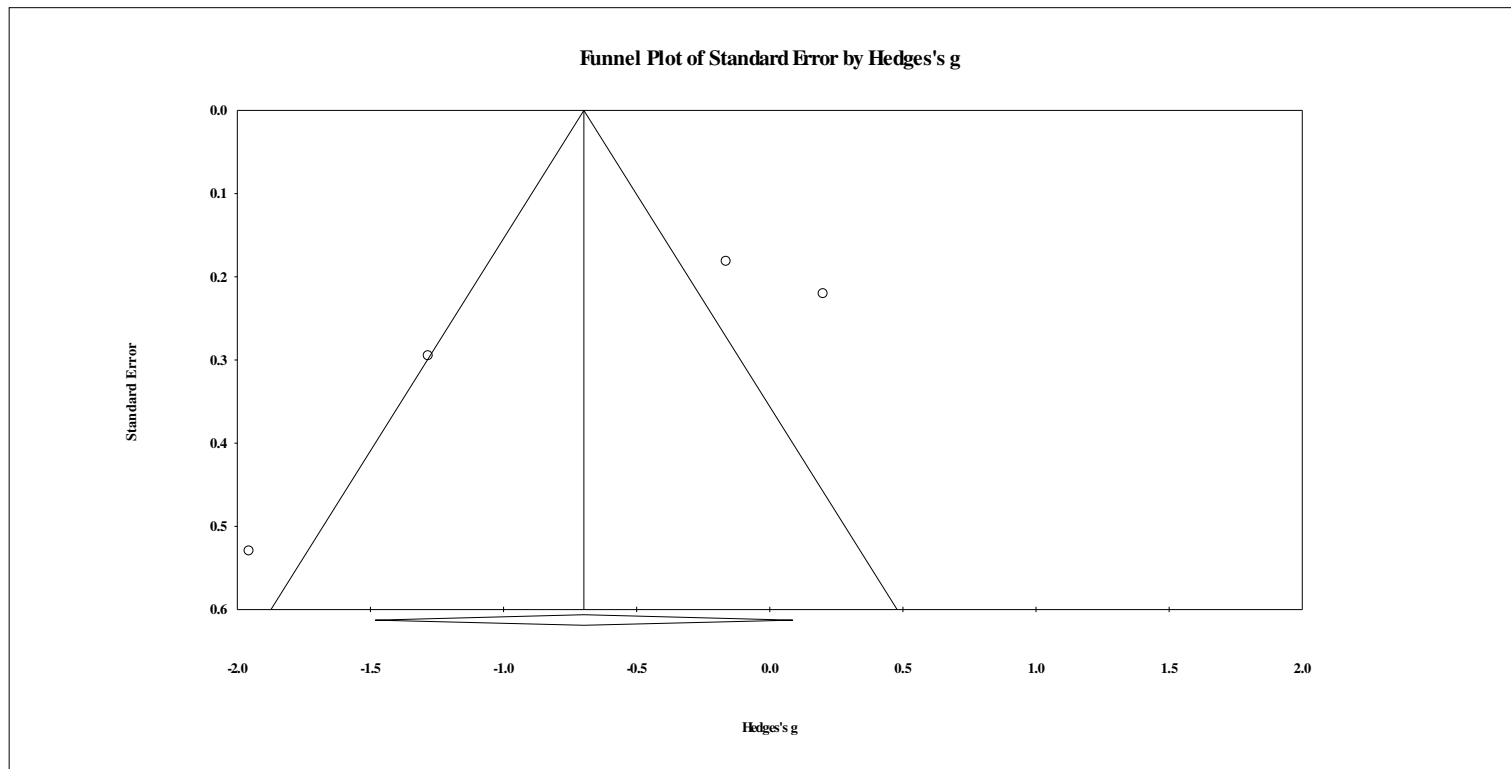

### 17. Neuropsychological measures of inhibition (adults)

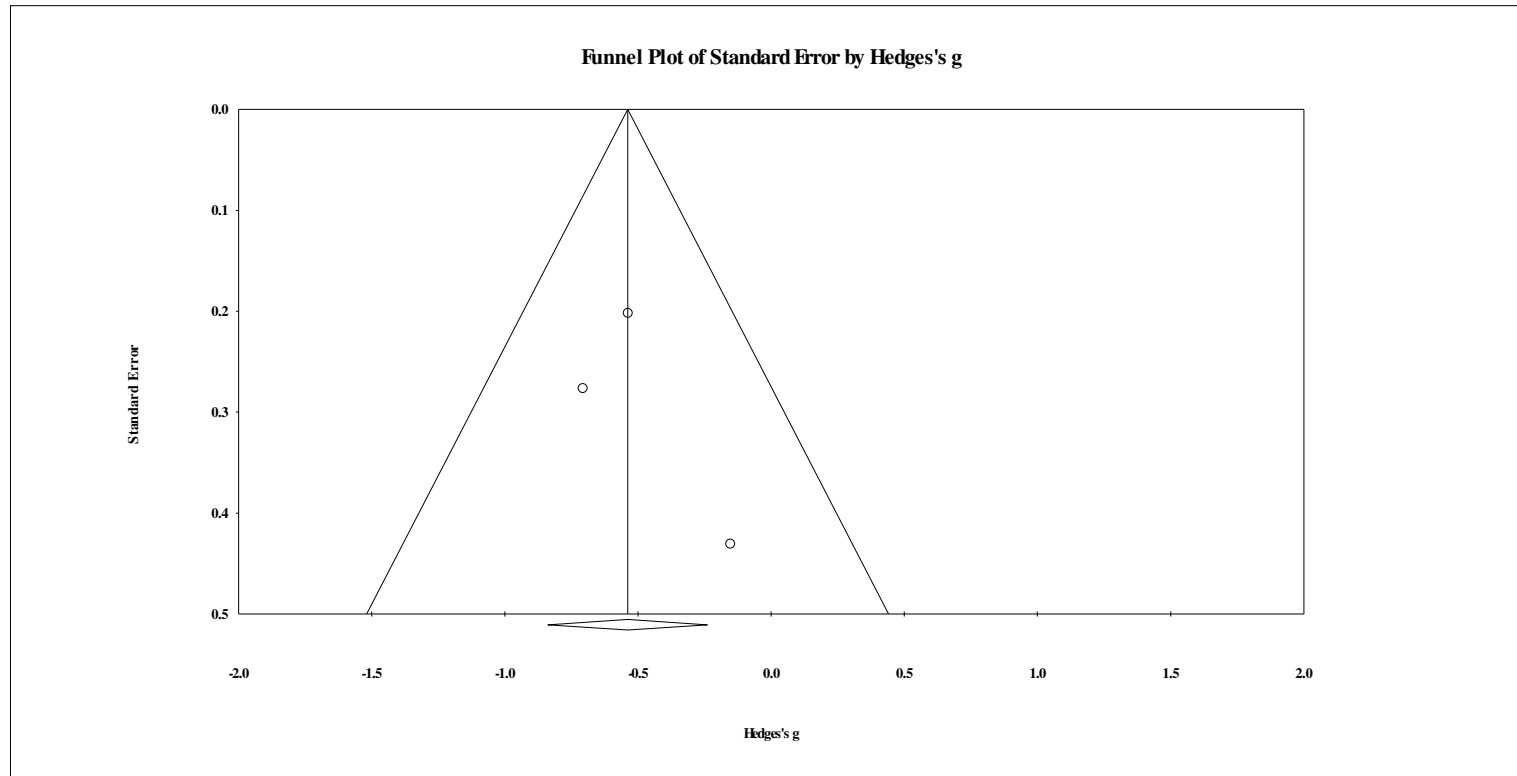

### 18. Neuropsychological measures of inattention (adults)

Not applicable

### 19. Neuropsychological measures of working memory (adults)

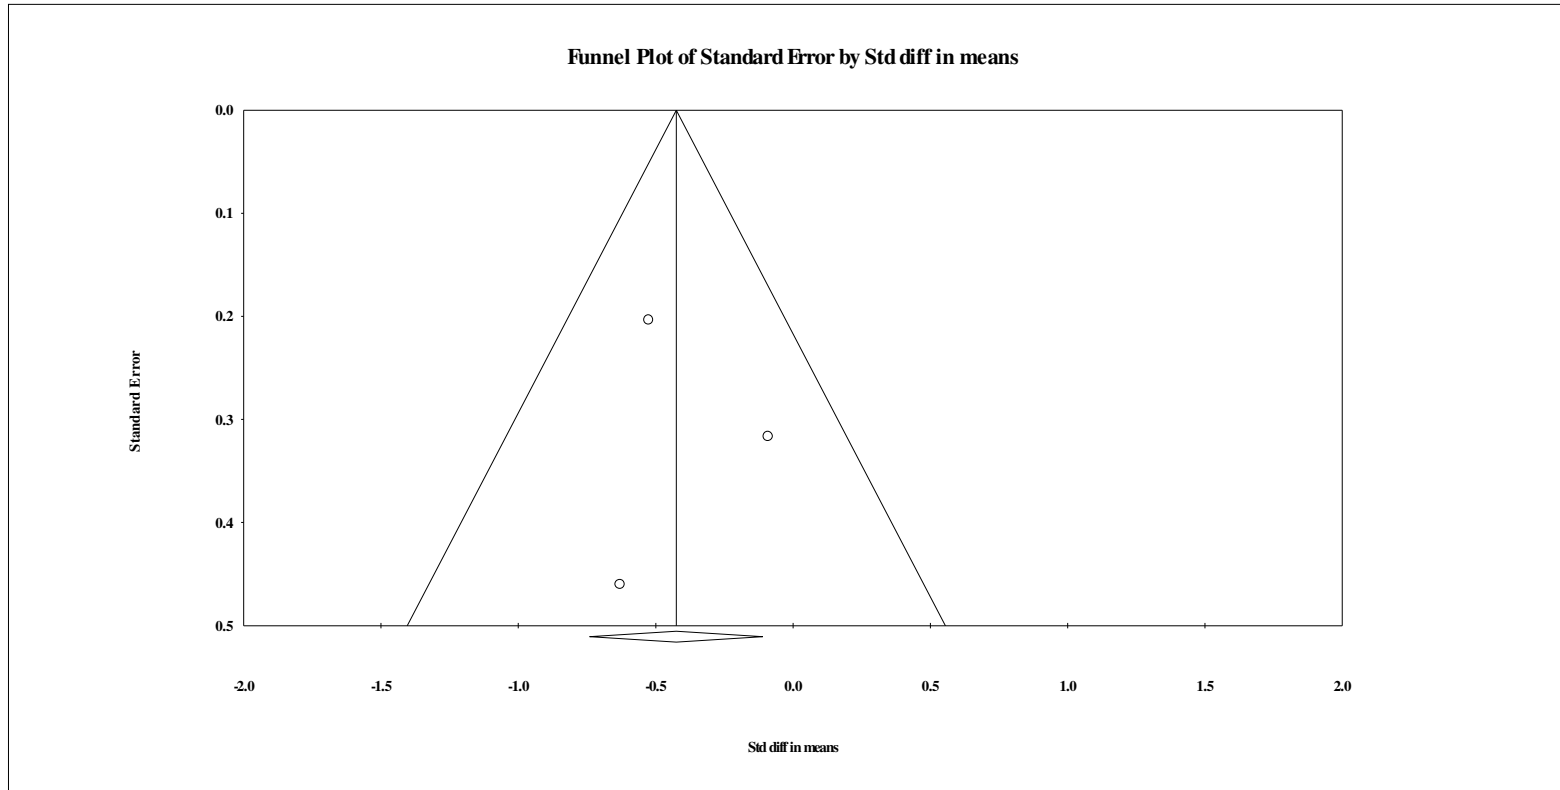

### 20. ADHD symptoms COMBINED OR inattention OR hyperactivity/ impulsivity (adults, studies with waiting list only)

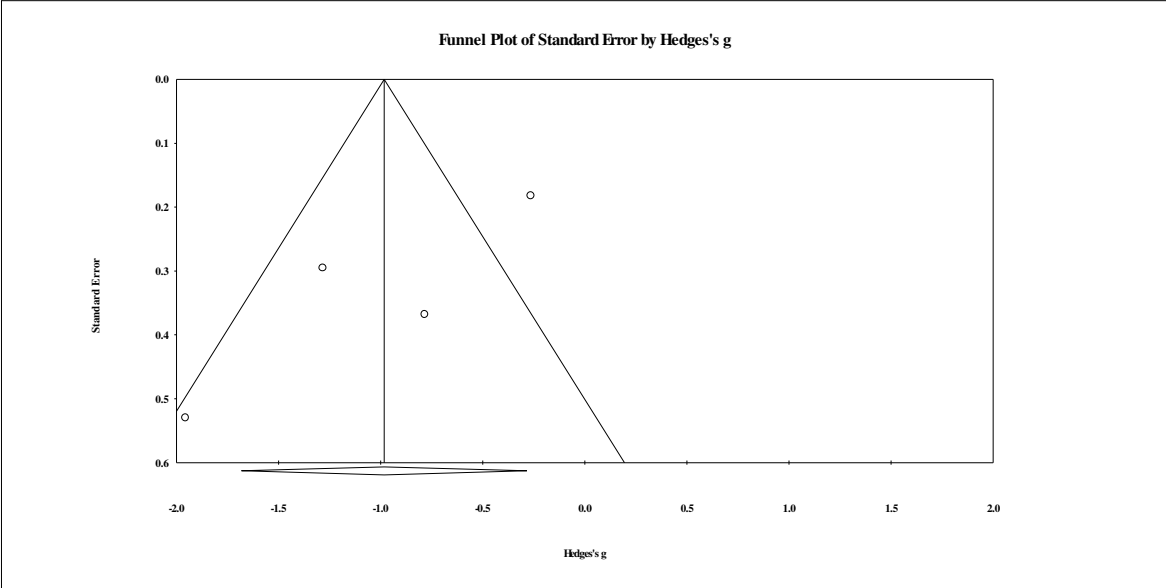

Supplement: inline-supplementary-material-1 [file inline-supplementary-material-1.pdf]
